1 **Efficacy and longevity of immune response to 3<sup>rd</sup> COVID-19 vaccine and effectiveness of**  
2 **a 4<sup>th</sup> dose in severely immunocompromised patients with cancer**

3  
4 Astha Thakkar<sup>1</sup>, Kith Pradhan<sup>2</sup>, Benjamin Duva<sup>1</sup>, Juan Manuel Carreño<sup>3,5</sup>, Srabani Sahu<sup>1</sup>, Victor  
5 Thiruthuvanathan<sup>1</sup>, Sean Campbell<sup>6</sup>, Sonia Gallego<sup>1</sup>, Tushar D Bhagat<sup>1</sup>, Johanna Rivera<sup>7</sup>,  
6 Gaurav Choudhary<sup>1</sup>, Raul Olea<sup>1</sup>, Maite Sabalza<sup>8</sup>, Lauren C. Shapiro<sup>1</sup>, Matthew Lee<sup>1</sup>, Ryann  
7 Quinn<sup>1</sup>, Ioannis Mantzaris<sup>1</sup>, Edward Chu<sup>1</sup>, Britta Will<sup>1</sup>, Liise-anne Pirofski<sup>7</sup>, Florian Krammer<sup>3,4,5</sup>,  
8 Amit Verma<sup>1\*</sup>, Balazs Halmos<sup>1\*</sup>

- 9 1. Department of Oncology, Montefiore Einstein Cancer Center, Albert Einstein College of  
10 Medicine  
11 2. Department of Epidemiology and Population Health, Albert Einstein College of Medicine  
12 3. Department of Microbiology, Icahn School of Medicine at Mount Sinai  
13 4. Department of Pathology, Molecular and Cell-Based Medicine, Icahn School of Medicine  
14 at Mount Sinai  
15 5. Center for Vaccine Research and Pandemic Preparedness (C-VARPP), Icahn School of  
16 Medicine at Mount Sinai  
17 6. Department of Pathology, Montefiore Medical Center  
18 7. Division of Infectious Diseases, Department of Medicine, Albert Einstein College of  
19 Medicine and Montefiore Medical Center  
20 8. EUROIMMUN, US

21  
22 \* Correspondence to:

23  
24 Dr. Balazs Halmos, bahalmos@montefiore.org

25 or

26 Dr. Amit Verma, amit.verma@einsteinmed.edu

27  
28 Keywords: COVID-19, Vaccine, Booster, Cancer

29  
30  
31  
32 **Abstract** (150 words)

33 Cancer patients show increased morbidity with COVID-19 and need effective immunization  
34 strategies. We demonstrate that a 3<sup>rd</sup> dose of COVID-19 vaccine leads to seroconversion in  
35 57% of patients that were seronegative after primary vaccination. The immune response is  
36 durable as assessed by anti-S antibody titers, T-cell activity and neutralization activity against  
37 wild-type SARS-CoV2 and BA1.1.529 at 6 months of follow up. A subset of severely  
38 immunocompromised hematologic malignancy patients were unable to mount adequate immune

39 response after the 3<sup>rd</sup> dose and were treated with a 4<sup>th</sup> dose in a prospective clinical trial which  
40 led to adequate immune-boost in 67% of patients. Low baseline IgM levels and CD19 counts  
41 were associated with inadequate seroconversion. Booster doses induced limited neutralization  
42 activity against the Omicron variant. These results indicate that vaccine booster-induced  
43 immunity is durable in cancer patients and additional doses can further stimulate immunity in a  
44 subset of hematologic malignancy patients.

#### 45 **Statement of significance**

46 We demonstrate that a 3<sup>rd</sup> dose of vaccine leads to seroconversion in 57% of negative patients  
47 with durable immune responses at 6 months. A 4<sup>th</sup> dose of vaccine can seroconvert hematologic  
48 malignancy patients with higher baseline IgM and CD19 levels.

49

#### 50 **Introduction**

51 It is now well-established that coronavirus disease 2019 (COVID-19) in patients with cancer  
52 carries a higher morbidity and mortality, especially in patients with hematologic malignancies[1-  
53 5]. While overall case fatality has decreased over time, mostly related to the impact of broad  
54 vaccinations and improved supportive/antimicrobial management, a higher case fatality rate was  
55 noted amongst cancer patients even during the Omicron (B.1.1.529) wave [6-8] . Advanced age,  
56 co-morbidities and performance status have emerged as key factors adversely impacting  
57 outcomes amongst patients with a cancer diagnosis[9]. Effective vaccines have been developed  
58 and authorized by the FDA to combat this pandemic[10, 11]. However, emerging data suggests  
59 that despite these vaccines inducing high levels of immunity in the general population, patients  
60 with hematologic malignancies have lower rates of seroconversion as defined by severe acute  
61 respiratory syndrome coronavirus 2 (SARS-CoV-2) spike antibody (anti-S antibody) titers [12,  
62 13]. Evidence has also suggested that specific therapies, such as anti-CD20 antibodies, BTK-  
63 inhibitors and stem cell transplantation (SCT) have an association with lower rates of  
64 seroconversion [14-16].

65

66 We previously published preliminary results of a study defining notable impacts of a 3<sup>rd</sup> booster  
67 dose of vaccine, demonstrating a more than 50% seroconversion rate amongst patients  
68 remaining seronegative after primary vaccinations[17]. Since then, we have completed our  
69 entire primary cohort to assess initial responses with a broad array of immunological assays  
70 along with now additional significant follow up allowing assessment of key aspects of waning  
71 immunity. Importantly, we additionally conducted a trial assessing the efficacy of fourth dose  
72 vaccinations amongst a highly immune suppressed group of patients with no or limited response  
73 to a prior booster vaccine dose. Here we present results of both key cohorts including results of  
74 serological, T cell and neutralization assays as well as correlations with other baseline clinical,  
75 treatment and laboratory parameters.

76

77

78

#### 79 **Methods**

80 **Patient recruitment and follow-up (ClinicalTrials.gov identifier NCT05016622) :**

81 3<sup>rd</sup> dose study

82 We recruited patients via an informed consent process. Patients were required to be >18 years  
83 of age and have a cancer diagnosis either on active treatment or requiring active surveillance.  
84 Patients were also required to have received 2 doses of the mRNA COVID-19 vaccine or 1 dose  
85 of the adenoviral vaccine prior to enrollment. After drawing baseline labs that included spike  
86 antibody, a sample for T-cell assay and a biobank sample, patients received booster mRNA  
87 vaccine (initially BNT162b2 per protocol, which was later amended to allow for booster mRNA-  
88 1273 vaccine after the Food and Drug Administration (FDA) authorized “booster” doses in fall of  
89 2021). Patients who had received Ad26.CoV2.S vaccine received a booster BNT162b2 vaccine.  
90 The patients then returned for follow-up 4 weeks and 4-6 months after their booster dose and  
91 their labs were repeated (Supplementary Fig 1).

92 4<sup>th</sup> dose study

93 We have previously reported preliminary findings of a 56% seroconversion rate for patients with  
94 cancer who did not have a detectable immune response after 2 doses[17]. For patients who did  
95 not seroconvert after 3 doses or had low antibody response (<1000 AU/mL as determined by  
96 our in-house assay, Abbott) we hypothesized whether a ‘mix and match’ strategy with 4<sup>th</sup> dose  
97 of COVID-19 vaccine would induce seroconversion/improved boosting of the humoral antibody  
98 responses. To study this, we designed a protocol wherein patients who had received 3 prior  
99 doses of mRNA vaccines and had undetectable anti-S antibody or had an anti-S antibody level  
100 of <1000 AU/mL measured at least 14 days after 3<sup>rd</sup> dose, would be randomized to an mRNA vs  
101 adenoviral 4<sup>th</sup> vaccine dose. Responses would be then assessed at 4 weeks after the 4<sup>th</sup> dose  
102 through measurement of anti-S antibody results. We also measured complete blood counts,  
103 quantitative immunoglobulin levels (IgG, IgA and IgM), lymphocyte subsets, T-cell responses  
104 and neutralization activity at baseline and 4 weeks for each of these patients. Following the  
105 implementation of this protocol, the Centers for Disease Control (CDC) published a statement  
106 that advised that the mRNA vaccines should be preferentially administered over the adenoviral  
107 vaccines given concern over rare side effects such as thrombocytopenia and thrombosis  
108 syndrome. Following this advisory, we amended our protocol to allow recruitment in a cohort  
109 that would receive a 4<sup>th</sup> dose of the BNT162b2 vaccine to comply with CDC guidelines  
110 (Supplementary Fig 1).

111 Anti-SARS-CoV2 Spike (anti-S) antibody assay

112 The AdviseDx SARS-CoV-2 IgG II assay was used for the assessment of anti-S IgG antibody.  
113 AdviseDx is an automated, two-step chemiluminescent immunoassay performed on the Abbott  
114 i1000SR instrument. The assay is designed to detect IgG antibodies directed against the  
115 receptor binding domain (RBD) of the S1 subunit of the spike protein of SARS-CoV-2. The RBD  
116 is a portion of the S1 subunit of the viral spike protein and has high affinity for the angiotensin  
117 converting enzyme 2 (ACE2) receptor on the cellular membrane[18, 19] The procedure, in brief,  
118 is as follows. Patient serum containing IgG antibodies directed against the RBD is bound to  
119 microparticles coated with SARS-CoV-2 antigen. The mixture is then washed of unbound IgG  
120 and anti-human IgG, acridinium-labeled, secondary antibody is added and incubated. Following  
121 another wash, sodium hydroxide is added and the acridinium undergoes an oxidative reaction,  
122 which releases light energy which is detected by the instrument and expressed as relative light  
123 units (RLU). There is a direct relationship between the amount of anti-spike IgG antibody and  
124 the RLU detected by the system optics. The RLU values are fit to a logistic curve which was  
125 used to calibrate the instrument and expresses results as a concentration in AU/mL (arbitrary

126 units/milliliter). This assay recently has shown high sensitivity (100%) and positive percent  
127 agreement with other platforms including a surrogate neutralization assay)[20] and also  
128 demonstrated high specificity both in the post SARS-CoV-2 infection and post vaccination  
129 settings. The cutoff value for this assay is 50 AU/mL with <50 AU/ml values reported as  
130 negative and the maximum value is 50000 AU/mL.

131

132

### 133 **SARS-CoV-2 Interferon Gamma Release Assay**

134 The EUROIMMUN SARS-COV-2 Interferon Gamma Release Assay (Quan-T-Cell  
135 SARS-CoV-2) was used for the assessment of patients' T-cell response to SARS-CoV-2  
136 antigens through analysis of the production of interferon gamma by patient T-cells after  
137 exposure to SARS- CoV-2 specific proteins. The assay does not differentiate between vaccine-  
138 or infection-induced T-cell responses. The SARS-CoV-2 IGRA assay is performed in two steps  
139 as per manufacturer instructions, and a brief protocol follows. First, patient samples from lithium  
140 heparin vacutainers are aliquoted into three separate tubes each. These tubes contain either  
141 nothing ('blank'), general T-cell activating proteins ('mitogen'), or components of the S1 domain  
142 of SARS-CoV-2 ('SARS-CoV-2 activated'). These samples were incubated at 37 degrees for 24  
143 hours before being centrifuged and the plasma separated and frozen at -80 degrees for later  
144 analysis. Samples were then batched to be run as a full 96 well plate along with calibrators and  
145 controls. Plasma samples were unfrozen and added to an ELISA plate, which was prepared  
146 with monoclonal interferon-gamma binding antibodies, along with calibrators and controls. After  
147 incubation at room temperature the plate was washed and biotin-labeled anti-interferon gamma  
148 antibody was added to bind the patient interferon gamma bound to the plate. The plate was  
149 again incubated before being washed of excess antibody and a streptavidin-bound horseradish  
150 peroxidase (HRP) enzyme added, which binds strongly to the biotin-labeled antibodies present.  
151 This was again incubated and then washed of excess enzyme before a solution of H<sub>2</sub>O<sub>2</sub> and  
152 TMB (3,3', 5,5;-tetramethylbenzidine, a peroxide-reactive chromogen) is added and allowed to  
153 react in the dark for 20 minutes. The reaction is then stopped through the addition of sulfuric  
154 acid and the results read at 450 nM with background subtraction at 650 nM. Results for controls  
155 and samples were quantified by the calibration curve generated on the same plate, and results  
156 were interpreted as long as controls were within the pre-specified range. Blank results for each  
157 specimen set were subtracted from each tube in the set and the mIU/mL for both the mitogen  
158 and SARS-CoV-2 activated samples were determined with the calibration curve. Samples with  
159 mitogen results below 400 mIU/mL were considered 'invalid', as the overall T-cell activity for that  
160 set was too low, and excluded from analysis. All other sample sets were interpreted as per  
161 manufacturer's instructions based on the SARS-CoV-2 activated sample results: less than 100  
162 mIU/mL were denoted as negative, and greater than or equal to 100 mIU/mL were denoted as  
163 positive.

164

### 165 **Neutralization assays**

#### 166 **Surrogate Virus Neutralization assay for wild type SARS-CoV-2**

167 The SARS-CoV-2 Surrogate Virus Neutralization Test Kit was used to measure antibodies that  
168 inhibit the interaction between viral RBD and ACE2 receptor. This test kit uses purified human  
169 ACE2 (hACE2) protein-coated enzyme-linked immunosorbent assay (ELISA) plates and  
170 horseradish peroxidase (HRP)-conjugated RBD to monitor the presence of circulating

171 antibodies in samples, including peripheral/capillary blood, serum, and plasma, which block the  
172 interaction of RBD-HRP with ACE2 with excellent correlation with the gold standard live virus  
173 plaque reduction neutralization test.

174

175 The kit contains two key components: RBD-HRP and hACE2. The protein-protein interaction  
176 between RBD-HRP and hACE2 is disrupted by neutralizing antibodies against SARS-CoV-2  
177 RBD, if present in a sample. After mixing the sample dilutions with the RBD-HRP solution,  
178 components are allowed to bind to the RBD. The neutralization antibody complexed to RBD-  
179 HRP remains in the supernatant and is removed during washing, The yellow color of the  
180 hACE2-coated wells is determined by the RBD HRP binding to the hACE2-coated wells after  
181 incubation with 3,3',5,5'-tetramethylbenzidine (TMB), followed by a stop solution. After the  
182 addition of the stop solution, a light-yellow color results from blocking agents interacting with  
183 RBDs and inhibiting hACE2 interactions.

#### 184 **Microneutralization assay (MNT).**

185 MNT assays were performed in a biosafety level 3 facility at the Icahn School of Medicine at  
186 Mount Sinai (ISMMS) as previously described[21]. Briefly, Vero E6-TMPRSS2 cells were  
187 seeded in 96-well cell culture plates at 20,000/well in complete Dulbecco's Modified Eagle  
188 Medium (cDMEM). The following day, heat-inactivated serum samples were serially diluted (3-  
189 fold) starting at a 1:10 dilution in 1x MEM (10x minimal essential medium (Gibco), 2mM L-  
190 glutamine, 0.1% sodium bicarbonate (Gibco), 10mM 4-(2-hydroxyethyl)-1-  
191 piperazineethanesulfonic acid (HEPES; Gibco), 100U/ml-1 penicillin, 100ug/ml-1  
192 streptomycin (Gibco) and 0.2% bovine serum albumin (MP Biomedicals)) supplemented with  
193 10% fetal bovine serum (FBS). The virus diluted at 10,000 tissue culture infectious dose 50%  
194 (TCID<sub>50</sub>) per ml of 1x MEM was added to the serum dilutions and incubated for 1h at room  
195 temperature (RT). After removal of cDMEM from Vero E6 cells, 120µl/well of the virus - serum  
196 mix were added to the cells and plates were incubated at 37°C for 1h. Mix was removed and  
197 100µl/well of each corresponding serum dilutions were added in a mirror fashion to the cell  
198 plates. Additional 100µl/well of 1x MEM 1% FBS (Corning) were added to the cells. Plates  
199 were incubated for 48h at 37°C and fixed with a 10% paraformaldehyde solution (PFA,  
200 Polysciences) for 24h at 4°C.

201 For staining, plates were washed with 200µl of PBS. Cells were permeabilized with  
202 150µl/well PBS containing 0.1% Triton X-100 for 15min at RT. Plates were washed 3x with  
203 PBST and blocked with 3% milk (American Bio) in PBST for 1h at RT. Blocking solution was  
204 removed and 100µl/well of the biotinylated mAb 1C7C7 anti-SARS nucleoprotein antibody  
205 (generated at the Center for Therapeutic Antibody Development at the ISMMS) were added at 2  
206 µg/ml for 1h at RT. Plates were then washed 3x with PBST and the secondary antibody goat  
207 anti-mouse IgG-HRP (Rockland Immunochemicals) was added at 1:3,000 in blocking solution  
208 for 1h at RT. Plates were washed 3x with PBST, and SIGMAFAST OPD (o-phenylenediamine,  
209 Sigma-Aldrich) was added for 10 min at RT. The reaction was stopped with 50µl/well 3M  
210 hydrochloric acid to the mixture. Optical density (OD<sub>490</sub>) was measured on an automated plater  
211 reader (Sinergy 4, BioTek). The inhibitory dilution 50% were calculated as previously described  
212 [22].

#### 213 **Statistical analysis**

214 The primary endpoint of the third dose study was to assess the rate of booster induced  
215 seroconversion amongst patients who remained seronegative at least 28 days following  
216 standard set of FDA authorized COVID-19 vaccinations. We hypothesized that booster dosing  
217 would convert at least 30% of the enrolled seronegative patients to seropositive as defined by  
218 our institutional Clinical Laboratory Improvement Amendments (CLIA) certified SARS-CoV-2  
219 spike IgG assay (as compared to 10% as our null hypothesis). In a pre-specified analysis, at  
220 least 26 evaluable seronegative patients were required to have sufficient power to be able to  
221 reach this assessment. A McNemar's test was used to determine the equality of marginal  
222 frequencies for paired nominal data with the aid of a homogeneity of stratum effects (HSE) test  
223 to check if the effect was the same across all levels of a stratifying variable[23]. A Wilcox test  
224 was used to determine if titers of two paired observations have changed over time subsequently  
225 using a Kruskal Wallis test to determine if this difference is associated with another variable. For  
226 the 4<sup>th</sup> dose study, a responder was considered any patient who showed seroconversion from  
227 negative anti-S antibody to positive anti-S antibody at 4 weeks after 4<sup>th</sup> dose or increase in titer  
228 to >1000 AU/mL at 4 weeks after the 4<sup>th</sup> dose. An alpha < 0.05 was considered statistically  
229 significant. Correlation between continuous variables was assessed using Spearman's test. All  
230 analyses were performed in R (version 3.6.2). This study was approved by The Albert Einstein  
231 College of Medicine Institutional Board Review.

232

233

## 234 Results

### 235 *Duration of immune responsiveness after third dose of covid vaccine in cancer patients:*

#### 236 Baseline characteristics

237 We previously reported outcomes for 88 patients enrolled into this study[17]. Here we present  
238 our final results for the complete cohort of 106 patients that were enrolled into this study for  
239 assessment of the primary endpoint of response at 4 weeks as well as 47 patients who  
240 completed 4-6 month follow-up. The baseline characteristics of this cohort are summarized in  
241 **Table 1**. The median age was 68 years (63.25-76.5 years)). Fifty five percent (58/106) of  
242 patients were female and 45% (48/106) were male. Our cohort was ethnically diverse and  
243 included 34% (36/106) Caucasian, 31% (33/106) African-American, 25% (27/106) Hispanic and  
244 8% (9/106) Asian patients. Majority of patients had received mRNA vaccines at baseline. Sixty-  
245 eight percent (72/106) received BNT162b2, 26% (28/106) received mRNA-1273 and 6% (6/106)  
246 had received Ad26.CoV2.S. Seventy four percent of patients (78/106) received a booster  
247 BNT162b2 vaccine and 26% (28/106) patients received booster mRNA-1273 vaccine. The  
248 majority of the patients, 62% (66/106), had a hematologic malignancy and 38% (40/106) had a  
249 solid tumor diagnosis. Further breakdown of cancer type and cancer status is summarized in  
250 **Table 1**. The majority of patients, 75% (80/106), were being actively treated at the time of  
251 receiving their booster vaccine.

#### 252 Serology results

253 Thirty three percent of the patients (35/106) were seronegative after 2 doses. At 4 weeks  
254 following the receipt of the booster vaccine, 57% (20/35) of these patients seroconverted and  
255 had a detectable antibody response as demonstrated by anti-S antibody testing, meeting the  
256 primary endpoint of our study. The median titer at baseline for the entire cohort was 212.1  
257 AU/mL (IQR 50-2873 AU/mL) and the median titer at 4 weeks for the entire cohort was 9997  
258 AU/mL (IQR 880.7-47063 AU/mL) (**Fig 1A**). The median rise in anti-S titer for patients with  
259 hematologic malignancies was 2167 AU/mL (IQR 0-10131 AU/mL) versus 31010 AU/mL (IQR  
260 9531-44464 AU/mL) in patients with solid malignancies ( $p<0.001$ ). Within the hematologic  
261 malignancies, patients with lymphoid cancers had a lower rise in median anti-S titers (1169  
262 AU/mL, IQR 0-8661 AU/mL) compared to those with myeloid malignancies; median anti-S titer  
263 9424 AU/mL (IQR 4381-20444 AU/mL) ( $p<0.001$ ) (**Fig 1B**).

264 We further investigated the association of specific anti-cancer therapies with the booster effect.  
265 Patients on BTKi therapy ( $n=12$ ) had a median rise in anti-S antibody of 0 AU/mL (IQR 0-3393  
266 AU/mL) compared to a median rise of 9355 AU/mL (IQR 877.3-34410 AU/mL) in anti-S antibody  
267 for patients not on BTKi ( $p<0.05$ ) (**Fig 1C**). Patients on anti-CD20 antibody therapy ( $n=25$ ) also  
268 had a median rise in anti-S antibody level of 0 AU/mL (IQR 0-910.5 AU/mL) compared to a  
269 median rise of 12735 AU/mL (IQR 2842-38863 AU/mL) in patients that did not receive anti-  
270 CD20 antibody therapy ( $p<0.05$ ). (**Fig 1D**). Nine patients had a history of SARS-CoV-2 infection  
271 and in this cohort the rise in anti-S titers was higher (median 19350 AU/mL, IQR 9286-32151  
272 AU/mL), compared to those who did not have prior SARS-CoV-2 infection with a median anti-S  
273 titer rise, 6706 AU/mL (IQR 444.1-33831 AU/mL). (**Fig 1E**). We also observed that the rise in  
274 anti-S titer at 4 weeks was higher for patients who received a mRNA-1273 booster compared to  
275 BNT162b2 booster; median 31451 AU/mL vs 5534 AU/mL respectively (**Fig 1F**). This  
276 observation was not however, statistically significant. These results are also summarized in  
277 **Table 2**.

## 278 **T cell immune responses**

279 We also studied T-cell immune responses through a SARS-CoV-2 interferon gamma release  
280 assay. At baseline, 88 patients had evaluable T-cell results and a positive T cell response  
281 against SARS-CoV-2 was seen in 74% (65/88) patients. Of these, 21 patients were  
282 seronegative for anti-S antibody at baseline. At 4 weeks, 89 patients had evaluable T-cell  
283 results and a positive result was seen in 85% (76/89) percent patients. Of the 15 patients with  
284 negative anti-S antibody at 4 weeks, 11 had a positive T-cell response. Fourteen patients who  
285 had a negative T-cell assay response at baseline had a positive T-cell response at 4 weeks.  
286 Anti-S titer showed a positive correlation with T-cell response at baseline and at 4 weeks for this  
287 cohort ( $p < 0.001$ ) (**Fig 1G**). These results are summarized in **Table 2**.

## 288 **Neutralization assays**

### 289 *Neutralization assay against wild type virus*

290 We tested neutralization pre- and post-3<sup>rd</sup> dose in this cohort using the GenScript surrogate  
291 virus neutralization assay. At baseline, biobanked samples from 103 patients were tested for  
292 neutralizing antibodies. Of these, 35 patients were seronegative at baseline and 68 patients  
293 were seropositive. Neutralizing antibodies were detected in 47 of 68 (69%) patients who were  
294 seropositive at baseline. The correlation between seropositivity and presence of neutralizing  
295 antibodies was statistically significant ( $p < 0.001$ , Fisher's exact test).

296 At 4 weeks post 3<sup>rd</sup> dose, samples from 100 patients were available for testing. Eighty five of  
297 these patients were seropositive at 4 weeks and 15 were seronegative. Neutralizing antibodies  
298 were detected in 77 of 85 (91%) seropositive patients at 4 weeks. The correlation between  
299 seropositivity and presence of neutralizing antibodies was also statistically significant at 4 weeks  
300 ( $p < 0.001$ , Fisher's exact test).

301 We also analyzed the correlation of anti-S titers at baseline and 4 weeks to the percentage of  
302 virus neutralization, with 30% or more neutralization being consistent with positive result for  
303 detection of neutralizing antibodies. We observed that at baseline and 4 weeks, anti-S titers  
304 correlated with percentage of viral neutralization with higher titers correlating with higher  
305 percentage of viral neutralization (Figure **1H**  $< 0.001$  by Spearman rank correlation). These  
306 results are summarized in **Table 2**.

### 307 *Neutralization against Omicron BA.1*

308 Thirty-five patients were found be seronegative after the 3<sup>rd</sup> dose. Due to the emergence of the  
309 Omicron BA.1 wave, we further assessed neutralization activity for the seronegative cohort  
310 (N=35) against wild type (WT) SARS-CoV-2 and BA 1.1.529 (Omicron BA.1). At 4 weeks  
311 neutralization was noted in 46% patients (16/35) for the WT virus while only 17% of patients had  
312 detectable neutralization activity (6/35) for the Omicron variant. These results are summarized  
313 in **Table 2**.

## 314 **Six-month follow-up post 3<sup>rd</sup> dose of vaccine**

315 Forty seven patients (44%) out of 106 completed 4-6 months follow-up for the third dose study.  
316 All these patients were seropositive 4 weeks after the 3<sup>rd</sup> dose and strikingly, we observed that  
317 all patients maintained a positive anti-S antibody at 4-6 months follow-up. Eleven of these 47  
318 patients had solid malignancies and 36 had hematologic malignancies. Six patients had



319 received anti-Covid monoclonal antibody (moAb) therapy as per standard of care (4  
320 tixagevimab-cilgavimab or Evusheld, 1 casirivimab/imdevimab or regen-co-v, and 1 sotrovimab  
321 between the 4-week and 4-6 months follow-up. A striking increase in titers in this small cohort of  
322 patients was noted to a median titer of 17481.2 AU/mL. Four patients had breakthrough SARS-  
323 CoV-2 infections and 9 patients had received a 4<sup>th</sup> dose of COVID-19 vaccine outside of the  
324 context of the study prior to the time of 4-6 month follow-up. The median decline in titer for 41  
325 patients who did not receive anti-SARS-CoV-2 moAb treatment in the interim to confound  
326 results was -922.2 AU/mL. When compared to the antibody levels 4 weeks after booster  
327 vaccination, the median percentage decline in titers was 56.4%. However, despite the noted  
328 decline not a single patient in this cohort seroreverted (**Fig 1I**), especially when compared to  
329 decline post 2 vaccines. In our initial report of seroconversion post-3<sup>rd</sup> booster, we reported  
330 waning of immunity in 99 patients post 2 vaccines. The median decline in the 99 patient cohort  
331 was 72.1% with 2 patients losing detectable antibody response [17]

332

333 ***Efficacy of 4<sup>th</sup> dose vaccine for patients that were seronegative or low seropositive after***  
334 ***3<sup>rd</sup> dose***

### 335 **Baseline characteristics**

336 Eighteen patients were enrolled into the 4<sup>th</sup> dose study. Median age for this cohort was 69.5  
337 years (IQR 65.5-73.8). Thirty nine percent (7/18) were seronegative at baseline and 61%  
338 patients (11/18) were sero-low (anti-S ab <1000 AU/mL). All patients had hematologic  
339 malignancies in this cohort and the breakdown of diagnoses is provided in **Table 3**. Eighty three  
340 percent of the patients (15/18) received BNT162b2 4<sup>th</sup> booster shots and 17% (3/18) patients  
341 received Ad26.CoV2.S as their 4<sup>th</sup> booster vaccine. In addition, we also measured baseline  
342 complete blood counts (CBC), lymphocyte subsets, immunoglobulin G, A and M (quantitative Ig)  
343 levels at baseline and 4 weeks. (**Table 4**).

### 344 **Anti-spike IgG responses after the 4<sup>th</sup> dose**

345 A patient was classified as a responder if they 1) had positive anti-S antibody at 4 weeks if  
346 seronegative at baseline or 2) if they achieved a titer of >1000 AU/mL at 4 weeks if they were  
347 sero-low at baseline. As such, we observed a 67% response rate (12/18) in patients for the 4<sup>th</sup>  
348 dose cohort. Two of 7 seronegative patients seroconverted to positive anti-S antibody at 4  
349 weeks with a seroconversion rate of 29% in this cohort. All low seronegative patients (11/11)  
350 responded with an IgG level > 1000 after the 4<sup>th</sup> dose (**Fig 2A**). For the whole cohort, the  
351 median anti-S antibody at baseline was 131.1 AU/mL (<50-432.9 AU/mL) and at 4 weeks was  
352 1700 AU/mL (IQR 64.3-18627 AU/mL). We further investigated association of baseline  
353 laboratory values, such as CBC, lymphocyte subsets and quantitative Ig levels and observed  
354 that patients in the responder group had higher baseline IgM (60.5 mg/dl) compared with the  
355 non-responder group (median 17 mg/dl, p<0.001) (**Fig 2B**). Additionally, we also observed that  
356 the median CD19+ cell count was significantly lower in the non-responder group versus the  
357 responder group (1 vs 113, p=0.04). These results are summarized in **Table 5**.

### 358 **T Cell activity against SARS-CoV-2 after the 4<sup>th</sup> dose**

359 T-cell activity was assessed at baseline and at 4 weeks using the SARS-CoV-2 interferon  
360 gamma release assay. At baseline, 14 patients had evaluable T-cell responses and a positive

361 response was noted in 79% patients (11/14). Of these, 3 patients had negative anti-S antibody  
362 at baseline. At 4 weeks after the 4<sup>th</sup> dose, a positive T-cell response was seen in 17/18 (94%)  
363 patients. These results are summarized in **Table 5**.

### 364 **Neutralization activity against SARS-CoV-2 after 4<sup>th</sup> dose**

365 We also assessed neutralization activity at baseline and at 4 weeks against WT and Omicron (B  
366 1.1.529, BA.1). The results are summarized in **Table 5**. Overall, neutralization activity was seen  
367 in 67% patient samples at baseline and in 72% patient samples at 4 weeks. Strikingly,  
368 neutralization activity against Omicron was absent in all patient samples at baseline, however  
369 became detectable in 33% (6/18) patients at 4 weeks after the 4<sup>th</sup> dose. The titer of anti-S  
370 antibody correlated with neutralization activity at baseline and at 4 weeks against the WT virus  
371 ( $p < 0.001$ ) (**Fig 2C**). We also observed correlation between the titer of anti-S antibody with  
372 neutralization activity at 4 weeks for the Omicron variant (**Fig 2D**).

### 373 **Exploratory analysis for immunoglobulin levels**

374 The observation for baseline IgM correlating with response to the 4<sup>th</sup> dose of the COVID-19  
375 vaccine led us to perform an exploratory analysis to assess if IgG and IgA levels would also  
376 correlate with the response. Given that our 4<sup>th</sup> dose cohort was small, we performed this  
377 exploratory analysis by combining the baseline immunoglobulin levels for the baseline  
378 seronegative cohort for the 3<sup>rd</sup> dose study (n=35) and baseline immunoglobulin levels for the 4<sup>th</sup>  
379 dose study (n=18). In this exploratory analysis, we observed that the median levels for all  
380 immunoglobulin subtypes were lower in patients who either did not seroconvert after the 3<sup>rd</sup>  
381 dose or did not respond to the 4<sup>th</sup> dose (IgA 49 mg/dL vs 116.5 mg/dL, IgM 16.6 mg/dL vs 48.3  
382 mg/dL, IgG 488 mg/dL vs 759.5 mg/dL with p values of 0.05, 0.002 and 0.006 respectively  
383 (Kruskal Wallis test).

### 384 **Discussion**

385 Since the authorization of 3<sup>rd</sup> doses for patients with a weakened immune system, several  
386 studies have shown enhanced immunogenicity for a third dose of COVID-19 vaccine in patients  
387 with cancer. [17, 24, 25] In particular, patients with lymphoid malignancies have been  
388 consistently shown to have reduced seroconversion after 2 doses of the COVID-19 vaccines[26-  
389 29]. Studies looking at immunogenicity of a 3<sup>rd</sup> dose of COVID-19 vaccines have reported that a  
390 subset of these patients can be induced to have an immune response with the 3<sup>rd</sup> dose of the  
391 COVID-19 vaccines.[17, 30]

392 Correlation between anti-S antibody titers and neutralization activity in patients with cancer has  
393 been demonstrated [31]. However, the emergence of the Omicron (B.1.1.529) variant which was  
394 discovered in November 2021 and then spread quickly globally, the situation changed. Omicron,  
395 with its extensive mutations in neutralizing epitopes, is able to at least partially evade *in vitro*  
396 neutralizing antibodies induced by 3<sup>rd</sup> doses in patients with cancer[31, 32]. The potential utility  
397 and timing of a 4<sup>th</sup> COVID-19 vaccine dose has been brought up especially for those who are at  
398 risk for poor seroconversion after 3<sup>rd</sup> doses[33], with the Centers for Disease Control (CDC)  
399 recommending 2 additional boosters following a 3-vaccine primary series[34]. These variants in  
400 part overcome vaccine-induced immunity and are resistant to many of the available monoclonal  
401 antibody products[31, 32, 35].

402

403 Our results demonstrate that a 3<sup>rd</sup> dose of COVID-19 vaccine boosts detectable anti-SARS-  
404 CoV-2 immunity in the majority of cancer patients and can seroconvert a subset of them not  
405 responding to prior vaccine doses. The 3<sup>rd</sup> COVID-19 vaccine also results in boosting of T-cell  
406 responses and leads to a rise in neutralizing antibodies. Patients who have received anti-CD20  
407 antibody therapy or BTK inhibitors remain at risk for lower seroconversion whereas those who  
408 have been infected with COVID-19 in the past, have a very strong immune response likely due  
409 to immunologic memory. Our results show that the higher the titer of the anti-S antibody, the  
410 higher likelihood of neutralization in a surrogate neutralization assay adding to the evidence that  
411 this may be a good strategy to prevent symptomatic SARS-CoV-2 infection as well as an  
412 appropriate surrogate marker to guide research and clinical management [36]. Our study also  
413 provides the reassuring finding that the large majority of patients with cancer retain detectable  
414 humoral immunity at 6 months post 3<sup>rd</sup> dose of COVID-19 vaccination.

415  
416 Reports of efficacy of 4<sup>th</sup> COVID-19 vaccine doses are emerging. A study from Israel  
417 demonstrated enhanced Omicron neutralization after a 4<sup>th</sup> dose of COVID-19 mRNA vaccine in  
418 healthy health-care workers[37]. However a study of 25 patients with solid organ transplant  
419 recipients showed that the 4<sup>th</sup> dose was not effective in inducing Omicron neutralization[38].  
420 Such a study has not been published yet for patients with cancer, making this an unmet need.  
421 We designed a prospective cohort study of a 4<sup>th</sup> dose of the COVID-19 vaccine in patients with  
422 cancer precisely to address this question. Our results suggest that in cohorts of highly immune  
423 suppressed patients, baseline assessment of immunity based on prior treatment history and  
424 immunological markers such as IgM levels and CD19+ cell levels may help predict the response  
425 to COVID-19 booster vaccinations and support administration of additional vaccine doses even  
426 in highly immune suppressed individuals. Notably, serum IgM levels were previously shown to  
427 correlate with mRNA vaccine responses of solid organ transplant recipients[39]. In addition,  
428 further testing to assess serological and cellular markers of the response may be helpful to  
429 identify the patients at highest risk to prioritize these patients for preventive/prophylactic  
430 strategies as well as enrichment markers for further experimental studies. Finally, the 4<sup>th</sup>  
431 vaccine dose results in a significant increase in anti-spike antibodies in low seropositive patients  
432 and seroconversion in a proportion of seronegative immunosuppressed patients with cancer.  
433 Similar to previous reports, the booster doses do lead to enhanced neutralization activity against  
434 the WT virus, but not the Omicron (BA.1) variant. Future efforts are needed to evaluate variant-  
435 specific vaccines as well as additional protective measures, such as passive immunization  
436 strategies, especially for this immunosuppressed patient population that may not benefit as  
437 much as healthy controls from booster doses of existing vaccines.

## 438 439 References

- 440 1. Kuderer, N.M., et al., *Clinical impact of COVID-19 on patients with cancer (CCC19): a cohort*  
441 *study*. *Lancet*, 2020. **395**(10241): p. 1907-1918.
- 442 2. Lee, L.Y.W., et al., *COVID-19 prevalence and mortality in patients with cancer and the effect of*  
443 *primary tumour subtype and patient demographics: a prospective cohort study*. *Lancet Oncol*,  
444 2020. **21**(10): p. 1309-1316.
- 445 3. Mehta, V., et al., *Case Fatality Rate of Cancer Patients with COVID-19 in a New York Hospital*  
446 *System*. *Cancer Discov*, 2020. **10**(7): p. 935-941.

- 447 4. Khoury, E., et al., *Differences in Outcomes and Factors Associated With Mortality Among*  
448 *Patients With SARS-CoV-2 Infection and Cancer Compared With Those Without Cancer: A*  
449 *Systematic Review and Meta-analysis.* JAMA Netw Open, 2022. **5**(5): p. e2210880.
- 450 5. Tang, L.V. and Y. Hu, *Poor clinical outcomes for patients with cancer during the COVID-19*  
451 *pandemic.* Lancet Oncol, 2020. **21**(7): p. 862-864.
- 452 6. Lee, M., et al., *Impact of COVID-19 on case fatality rate of patients with cancer during the*  
453 *Omicron wave.* Cancer Cell, 2022. **40**(4): p. 343-345.
- 454 7. Pinato, D.J., et al., *Outcomes of the SARS-CoV-2 omicron (B.1.1.529) variant outbreak among*  
455 *vaccinated and unvaccinated patients with cancer in Europe: results from the retrospective,*  
456 *multicentre, OnCovid registry study.* Lancet Oncol, 2022.
- 457 8. Bestvina, C.M., et al., *COVID-19 Outcomes, Patient Vaccination Status, and Cancer-Related*  
458 *Delays during the Omicron Wave: A Brief Report from the TERA-VOLT Analysis.* JTO Clin Res Rep,  
459 2022: p. 100335.
- 460 9. Grivas, P., et al., *Association of clinical factors and recent anticancer therapy with COVID-19*  
461 *severity among patients with cancer: a report from the COVID-19 and Cancer Consortium.* Ann  
462 Oncol, 2021. **32**(6): p. 787-800.
- 463 10. Sadoff, J., et al., *Safety and Efficacy of Single-Dose Ad26.COV2.S Vaccine against Covid-19.* N Engl  
464 J Med, 2021. **384**(23): p. 2187-2201.
- 465 11. Polack, F.P., et al., *Safety and Efficacy of the BNT162b2 mRNA Covid-19 Vaccine.* N Engl J Med,  
466 2020. **383**(27): p. 2603-2615.
- 467 12. Thakkar, A., et al., *Seroconversion rates following COVID-19 vaccination among patients with*  
468 *cancer.* Cancer Cell, 2021. **39**(8): p. 1081-1090.e2.
- 469 13. Addeo, A., et al., *Immunogenicity of SARS-CoV-2 messenger RNA vaccines in patients with*  
470 *cancer.* Cancer Cell, 2021. **39**(8): p. 1091-1098.e2.
- 471 14. Schönlein, M., et al., *Risk factors for poor humoral response to primary and booster SARS-CoV-2*  
472 *vaccination in hematologic and oncological outpatients-COVIDOUT study.* Cancer Cell, 2022.
- 473 15. Guven, D.C., et al., *Impact of Therapy in Patients with Hematologic Malignancies on*  
474 *Seroconversion Rates After SARS-CoV-2 Vaccination.* Oncologist, 2022. **27**(4): p. e357-e361.
- 475 16. Dahiya, S., et al., *Impaired immune response to COVID-19 vaccination in patients with B-cell*  
476 *malignancies after CD19 CAR T-cell therapy.* Blood Adv, 2022. **6**(2): p. 686-689.
- 477 17. Shapiro, L.C., et al., *Efficacy of booster doses in augmenting waning immune responses to*  
478 *COVID-19 vaccine in patients with cancer.* Cancer Cell, 2022. **40**(1): p. 3-5.
- 479 18. Pillay, T.S., *Gene of the month: the 2019-nCoV/SARS-CoV-2 novel coronavirus spike protein.* J Clin  
480 Pathol, 2020. **73**(7): p. 366-369.
- 481 19. Yang, J., et al., *Molecular interaction and inhibition of SARS-CoV-2 binding to the ACE2 receptor.*  
482 Nat Commun, 2020. **11**(1): p. 4541.
- 483 20. Bradley, B.T., et al., *Anti-SARS-CoV-2 Antibody Levels Measured by the AdviseDx SARS-CoV-2*  
484 *Assay Are Concordant with Previously Available Serologic Assays but Are Not Fully Predictive of*  
485 *Sterilizing Immunity.* J Clin Microbiol, 2021. **59**(9): p. e0098921.
- 486 21. Carreño, J.M., et al., *Activity of convalescent and vaccine serum against SARS-CoV-2 Omicron.*  
487 Nature, 2022. **602**(7898): p. 682-688.
- 488 22. Amanat, F., et al., *An In Vitro Microneutralization Assay for SARS-CoV-2 Serology and Drug*  
489 *Screening.* Curr Protoc Microbiol, 2020. **58**(1): p. e108.
- 490 23. Zhao, Y.D., et al., *Testing homogeneity of stratum effects in stratified paired binary data.* J  
491 Biopharm Stat, 2014. **24**(3): p. 600-7.
- 492 24. Munro, A.P.S., et al., *Safety and immunogenicity of seven COVID-19 vaccines as a third dose*  
493 *(booster) following two doses of ChAdOx1 nCov-19 or BNT162b2 in the UK (COV-BOOST): a*

494 *blinded, multicentre, randomised, controlled, phase 2 trial.* Lancet, 2021. **398**(10318): p. 2258-  
495 2276.

496 25. Shroff, R.T., et al., *Immune responses to two and three doses of the BNT162b2 mRNA vaccine in*  
497 *adults with solid tumors.* Nat Med, 2021. **27**(11): p. 2002-2011.

498 26. Greenberger, L.M., et al., *Antibody response to SARS-CoV-2 vaccines in patients with*  
499 *hematologic malignancies.* Cancer Cell, 2021. **39**(8): p. 1031-1033.

500 27. Perry, C., et al., *Efficacy of the BNT162b2 mRNA COVID-19 vaccine in patients with B-cell non-*  
501 *Hodgkin lymphoma.* Blood Adv, 2021. **5**(16): p. 3053-3061.

502 28. Herishanu, Y., et al., *Efficacy of the BNT162b2 mRNA COVID-19 vaccine in patients with chronic*  
503 *lymphocytic leukemia.* Blood, 2021. **137**(23): p. 3165-3173.

504 29. Ghione, P., et al., *Impaired humoral responses to COVID-19 vaccination in patients with*  
505 *lymphoma receiving B-cell-directed therapies.* Blood, 2021. **138**(9): p. 811-814.

506 30. Lim, S.H., et al., *Immune responses against SARS-CoV-2 variants after two and three doses of*  
507 *vaccine in B-cell malignancies: UK PROSECO study.* Nat Cancer, 2022. **3**(5): p. 552-564.

508 31. Mack, P.C., et al., *Longitudinal COVID-19-vaccination-induced antibody responses and Omicron*  
509 *neutralization in patients with lung cancer.* Cancer Cell, 2022.

510 32. Chang, A., et al., *Humoral Responses Against SARS-CoV-2 and Variants of Concern After mRNA*  
511 *Vaccines in Patients With Non-Hodgkin Lymphoma and Chronic Lymphocytic Leukemia.* J Clin  
512 *Oncol*, 2022: p. Jco2200088.

513 33. Ehmsen, S., et al., *Antibody responses following third mRNA COVID-19 vaccination in patients*  
514 *with cancer and potential timing of a fourth vaccination.* Cancer Cell, 2022. **40**(4): p. 338-339.

515 34. *<COVID-19 Vaccines for People who are Moderately or Severely Immunocompromised \_*  
516 *CDC.pdf>.*

517 35. Zhou, H., et al., *SARS-CoV-2 Omicron BA.2 Variant Evades Neutralization by Therapeutic*  
518 *Monoclonal Antibodies.* bioRxiv, 2022: p. 2022.02.15.480166.

519 36. Khoury, D.S., et al., *Neutralizing antibody levels are highly predictive of immune protection from*  
520 *symptomatic SARS-CoV-2 infection.* Nat Med, 2021. **27**(7): p. 1205-1211.

521 37. Regev-Yochay, G., et al., *Efficacy of a Fourth Dose of Covid-19 mRNA Vaccine against Omicron.* N  
522 *Engl J Med*, 2022. **386**(14): p. 1377-1380.

523 38. Karaba, A.H., et al., *A Fourth Dose of COVID-19 Vaccine Does Not Induce Neutralization of the*  
524 *Omicron Variant Among Solid Organ Transplant Recipients With Suboptimal Vaccine Response.*  
525 *Transplantation*, 2022.

526 39. Azzi, Y., et al., *Risk factors associated with poor response to COVID-19 vaccination in kidney*  
527 *transplant recipients.* Kidney Int, 2021. **100**(5): p. 1127-1128.

528

**Table 1: Baseline characteristics for 3rd dose cohort.**

| <b>Baseline characteristics</b> | <b>n=106</b>           |
|---------------------------------|------------------------|
| <b>Age (median, IQR)</b>        | <b>68 (63.25-76.5)</b> |
| <b>Sex</b>                      |                        |
| Male                            | 48(45%)                |
| Female                          | 58(55%)                |
| <b>Race</b>                     |                        |
| Caucasian                       | 36(34%)                |
| African-American                | 33(31%)                |
| Hispanic                        | 27(25%)                |

|                                            |         |
|--------------------------------------------|---------|
| Asian                                      | 9(8%)   |
| Other                                      | 1(1%)   |
| <b>Previous vaccine given</b>              |         |
| BNT162b2                                   | 72(68%) |
| mRNA-1273                                  | 28(26%) |
| Ad26.CoV2.S                                | 6(6%)   |
| <b>Type of booster vaccine</b>             |         |
| BNT162b2                                   | 78(74%) |
| mRNA-1273                                  | 28(26%) |
| <b>Malignancy category</b>                 |         |
| Hematologic malignancy                     | 66(62%) |
| Solid Malignancy                           | 40(38%) |
| <b>Lymphoid/Myeloid/Solid</b>              |         |
| Lymphoid                                   | 55(52%) |
| Myeloid                                    | 11(10%) |
| Solid                                      | 40(38%) |
| <b>Cancer status</b>                       |         |
| Active                                     | 69(65%) |
| Progressive                                | 3(3%)   |
| Recurrent                                  | 3(3%)   |
| Relapse                                    | 7(7%)   |
| Remission                                  | 24(23%) |
| <b>On treatment at the time of booster</b> |         |
| Yes                                        | 80(75%) |
| No                                         | 26(25%) |

529

| <b>Table 2. Results for 3rd dose of vaccine.</b>     |                 |                 |                     |         |
|------------------------------------------------------|-----------------|-----------------|---------------------|---------|
| <b>Spike antibody results</b>                        |                 | n=106           |                     |         |
|                                                      | 4-week negative | 4-week positive | Seroconversion rate | p value |
| Baseline negative                                    | 15              | 20              | 57%                 | <0.001* |
| Baseline positive                                    | 0               | 71              |                     |         |
| Total                                                | 15              | 91              |                     |         |
| <b>Rise in spike antibody titers overall (AU/mL)</b> | <b>Median</b>   | <b>IQR</b>      |                     |         |
| Titer at baseline                                    | 212.1           | 50-2873         |                     |         |
| Titer at 4 weeks                                     | 9997            | 880.7-47063     |                     |         |
| <b>Rise in spike antibody titers (AU/mL)</b>         | <b>Median</b>   | <b>IQR</b>      |                     |         |

|                                                                        |        |             |  |             |
|------------------------------------------------------------------------|--------|-------------|--|-------------|
| Hematologic malignancy                                                 | 2167   | 0-10131     |  | <0.001<br>* |
| Solid malignancy                                                       | 31010  | 9531-44464  |  |             |
| <b>Rise in spike antibody titers by solid/lymphoid/myeloid (AU/mL)</b> |        |             |  |             |
| Lymphoid cancers                                                       | 1169   | 0-8661      |  | <0.001<br>* |
| Myeloid cancers                                                        | 9424   | 4381-20444  |  |             |
| Solid cancers                                                          | 31010  | 9531-44464  |  |             |
|                                                                        |        |             |  |             |
| <b>Association with certain cancer-directed therapies</b>              |        |             |  |             |
| <b>Bruton's tyrosine kinase inhibitors</b>                             |        |             |  |             |
| Change in spike antibody titers (AU/mL)                                | Median | IQR         |  |             |
| Patients on BTKi (n=12)                                                | 0      | 0-3393      |  | <0.001<br>* |
| Patients not on BTKi                                                   | 9355   | 877.3-34410 |  |             |
| <b>Anti-CD20 antibody treatment</b>                                    |        |             |  |             |
| Change in spike antibody titers (AU/mL)                                | Median | IQR         |  |             |
| Patients on CD20 (n=25)                                                | 0      | 0-910.5     |  | 0.0133*     |
| Patients not on CD20                                                   | 12735  | 2842-38863  |  |             |
| <b>Anti-CD20 antibody treatment within 6 months</b>                    | Median | IQR         |  |             |
| Yes                                                                    | 0      | 0-0         |  | 0.0548<br>2 |
| No                                                                     | 587    | 0-4314      |  |             |
| <b>Change in spike antibody titer by prior COVID infection</b>         | Median | IQR         |  |             |
| Yes (n=9)                                                              | 19350  | 9286-32151  |  | 0.3051      |
| No (n=96)                                                              | 6706   | 444.1-33831 |  |             |
| <b>Change in spike antibody titer by type of booster given</b>         | Median | IQR         |  |             |
| BNT162b2                                                               | 5534   | 433.8-18074 |  | 0.0901<br>4 |
| mRNA-1273                                                              | 31451  | 515.5-45057 |  |             |
| <b>T-cell activity</b>                                                 |        |             |  |             |
| Baseline                                                               | n=88   | %           |  |             |
| Positive                                                               | 65     | 74%         |  |             |
| Negative                                                               | 23     | 26%         |  |             |
| <b>4-week</b>                                                          | n=89   |             |  |             |
| Positive                                                               | 76     | 85%         |  |             |
| Negative                                                               | 13     | 15%         |  |             |

| <b>Baseline Neutralization activity assay (all evaluable patients, WT virus)</b>  |                          |                          |       |         |
|-----------------------------------------------------------------------------------|--------------------------|--------------------------|-------|---------|
|                                                                                   | Anti-S antibody negative | Anti-S antibody positive | Total | p value |
| Neutralizing antibodies detected                                                  | 0                        | 47                       | 47    | <0.001  |
| Neutralizing antibodies not detected                                              | 35                       | 21                       | 56    |         |
| Total                                                                             | 35                       | 68                       | 103   |         |
| <b>Four-week Neutralization activity assay (all evaluable patients, WT virus)</b> |                          |                          |       |         |
|                                                                                   | Anti-S antibody negative | Anti-S antibody positive | Total | p value |
| Neutralizing antibodies detected                                                  | 0                        | 77                       | 77    | <0.001  |
| Neutralizing antibodies not detected                                              | 15                       | 8                        | 23    |         |
| Total                                                                             | 15                       | 85                       | 100   |         |
| <b>Four week Neutralization assay (seronegative cohort 4 weeks)</b>               |                          |                          |       |         |
| <b>Wild type</b>                                                                  | n=35                     |                          |       |         |
| Negative                                                                          | 19                       | 54%                      |       |         |
| Positive                                                                          | 16                       | 46%                      |       |         |
| <b>Omicron</b>                                                                    |                          |                          |       |         |
| Negative                                                                          | 29                       | 83%                      |       |         |
| Positive                                                                          | 6                        | 17%                      |       |         |

530

|                                                        | N (%)    |
|--------------------------------------------------------|----------|
| <b>Baseline seronegative</b>                           | 7 (39%)  |
| <b>Baseline low positive (Spike ab &lt;1000 AU/mL)</b> | 11 (61%) |
| <b>Cancer diagnosis</b>                                |          |
| CLL                                                    | 7 (39%)  |
| Waldenstrom's Macroglobulinemia                        | 3 (17%)  |
| DLBCL                                                  | 2 (11%)  |
| Multiple Myeloma                                       | 2 (11%)  |
| Mantle Cell Lymphoma                                   | 1 (6%)   |
| Marginal Zone lymphoma                                 | 1 (6%)   |
| Hodgkins lymphoma                                      | 1 (6%)   |
| MDS                                                    | 1 (6%)   |



| <b>Fourth dose vaccine type</b> |          |
|---------------------------------|----------|
| BNT162b2                        | 15 (83%) |
| Ad26.CoV2.S                     | 3 (17%)  |

531

| <b>Table 4: Correlation of 4th dose vaccine response with baseline characteristics.</b> |                            |                         |                |
|-----------------------------------------------------------------------------------------|----------------------------|-------------------------|----------------|
|                                                                                         | <b>Non-responder (n=6)</b> | <b>Responder (n=12)</b> | <b>p value</b> |
| Age                                                                                     | 79.5                       | 67.5                    | 0.01293 *      |
| Baseline WBC                                                                            | 4.95                       | 5.15                    | 0.45           |
| Baseline ANC                                                                            | 2.6                        | 3.5                     | 0.26           |
| Baseline ALC                                                                            | 1.2                        | 1.3                     | 0.57           |
| Baseline AMC                                                                            | 0.5                        | 0.65                    | 0.73           |
| Baseline Absolute CD3                                                                   | 773                        | 835.5                   | 0.57           |
| Baseline Absolute CD4                                                                   | 406.5                      | 407.5                   | 0.71           |
| Baseline Absolute CD8                                                                   | 310                        | 247                     | 0.40           |
| Baseline Absolute CD19                                                                  | 1                          | 113.5                   | 0.04874 *      |
| Baseline Absolute CD16/56                                                               | 243.5                      | 200                     | 0.57           |
| Baseline IgG                                                                            | 777                        | 757                     | 0.51           |
| Baseline IgA                                                                            | 90.5                       | 118                     | 0.57           |
| Baseline IgM                                                                            | 17                         | 60.5                    | 0.001442 **    |
| 4 week WBC                                                                              | 5.1                        | 5.8                     | 0.40           |
| 4 week ANC                                                                              | 2.7                        | 3.45                    | 0.57           |
| 4 week ALC                                                                              | 1.1                        | 1.4                     | 0.60           |
| 4 week AMC                                                                              | 0.55                       | 0.65                    | 0.60           |
| 4 week absolute CD3                                                                     | 754                        | 983                     | 0.40           |
| 4 week absolute CD4                                                                     | 461.5                      | 369.5                   | 0.93           |
| 4 week absolute CD8                                                                     | 297.5                      | 269                     | 0.40           |
| 4 week absolute CD19                                                                    | 2.5                        | 105                     | 0.07           |
| 4 week absolute CD16/56                                                                 | 232.5                      | 219                     | 0.93           |
| 4 week IgG*                                                                             | 741.5                      | 832                     | 0.62           |
| 4 week IgA*                                                                             | 86                         | 112                     | 0.69           |
| 4 week IgM*                                                                             | 15                         | 62                      | 0.003561 **    |
| *n=11 for responder group                                                               |                            |                         |                |

532

| <b>Table 5: Results for 4th dose study.</b> |      |              |           |
|---------------------------------------------|------|--------------|-----------|
| <b>Overall response</b>                     | 18   |              |           |
| Responder                                   | 12   | 67%          |           |
| Non-responder                               | 6    | 33%          |           |
| <b>Median age</b>                           |      | IQR          |           |
| Responder                                   | 67.5 | 63.75- 70.75 | 0.01293 * |
| Non-responder                               | 79.5 | 72.75- 81.75 |           |
| <b>Median baseline IgM</b>                  |      |              |           |

|                                                  |          |            |                 |
|--------------------------------------------------|----------|------------|-----------------|
| Responder                                        | 60.5     |            | 0.001442<br>* * |
| Non-responder                                    | 17       |            |                 |
| <b>Median spike antibody at baseline (AU/mL)</b> | 131.1    | <50-432.9  |                 |
| <b>Median spike antibody at 4 weeks (AU/mL)</b>  | 1700     | 64.3-18627 |                 |
| <b>T-cell activity at baseline</b>               | n=14     |            |                 |
| Positive                                         | 11       | 79%        |                 |
| Negative                                         | 3        | 21%        |                 |
| <b>T cell activity at 4 weeks</b>                | n=18     |            |                 |
| Positive                                         | 17       | 94%        |                 |
| Negative                                         | 1        | 6%         |                 |
| <b>Neutralization assay baseline</b>             | Negative | Positive   |                 |
| WT                                               | 6(33%)   | 12(67%)    |                 |
| Omicron                                          | 18(100%) | 0(0%)      |                 |
| <b>Neutralization assay 4 week</b>               | Negative | Positive   |                 |
| WT                                               | 5(28%)   | 13(72%)    |                 |
| Omicron                                          | 12(67%)  | 6(33%)     |                 |

- 533
- 534 **Table legend:**
- 535 Table 1: Baseline characteristics of 3<sup>rd</sup> dose cohort
- 536 Table 2: Summary of results for 3<sup>rd</sup> dose cohort
- 537 Table 3: Baseline characteristics for 4<sup>th</sup> dose cohort
- 538 Table 4: Correlation of baseline characteristics with outcome for 4<sup>th</sup> dose cohort
- 539 Table 5: Summary of results for 4<sup>th</sup> dose cohort
- 540 **Figure legend**
- 541 Figure 1: Immunogenicity of 3<sup>rd</sup> dose of COVID-19 vaccine in seronegative cancer patients
- 542 Figure 1A: Figure showing change in anti-S antibody titer at 4 weeks for entire cohort
- 543 Figure 1B: Figure showing change in anti-S antibody titer at 4 weeks split by cancer type (solid
- 544 cancer, lymphoid cancer and myeloid cancer)
- 545 Figure 1C: Figure showing effect of Bruton's tyrosine kinase inhibitor (BTKi) therapy on anti-S
- 546 antibody titer at baseline and 4 weeks of 3<sup>rd</sup> dose
- 547 Figure 1D: Figure showing effect of anti-CD20 antibody therapy on anti-S antibody titer at
- 548 baseline and 4 weeks of 3<sup>rd</sup> dose
- 549 Figure 1E: Figure showing effect of prior COVID-19 infection on anti-S antibody titer at baseline
- 550 and 4 weeks of 3<sup>rd</sup> dose

551 Figure 1F: Figure showing effect of booster type (BNT162b2 vs mRNA 1273) on anti-S antibody  
552 titer at baseline and 4 weeks of 3<sup>rd</sup> dose.

553 Figure 1G: Line diagram showing correlation between anti-Spike IgG titer and baseline T-cell  
554 activity at baseline and 4 weeks

555 Figure 1H: Line diagram showing correlation between anti-S titer and signal inhibition for  
556 neutralization against WT virus at baseline and 4 weeks.

557 Figure 1I: Anti-Spike IgG titres at baseline, 4 weeks and 6 months after 3<sup>rd</sup> dose of COVID-19  
558 vaccine in cancer patients. Line shows means with error bars (S.D.).

559 Figure 2: Immunogenicity of the 4<sup>th</sup> dose of COVID-19 vaccine in cancer patients with  
560 seronegativity after 3 doses

561 Figure 2A: Anti-spike IgG levels after the 4<sup>th</sup> dose of COVID-19 vaccine for the entire cohort

562 Figure 2B: Correlation of baseline IgM levels with response to 4<sup>th</sup> dose of vaccine

563 Figure 2C: Line diagram showing correlation between anti-S titer and neutralization activity for  
564 WT virus at baseline and 4 weeks

565 Figure 2D: Line diagram showing correlation between titer and neutralization activity for  
566 Omicron strain at baseline and 4 weeks

567

568 **Acknowledgements:** This study was supported with funding from the National Cancer Institute  
569 Grant 3P30CA013330-49S3 and NCORP Grant 2UG1CA189859-06. The authors also  
570 acknowledge support from the Jane and Myles Dempsey Family. The funders had no role in  
571 study design, data collection and analysis, decision to publish, or preparation of the manuscript.  
572 Work in the Krammer laboratory was partially funded by the Centers of Excellence for Influenza  
573 Research and Surveillance (CEIRS, contract # HHSN272201400008C), the Centers of  
574 Excellence for Influenza Research and Response (CEIRR, contract # 75N93021C00014), by  
575 the Collaborative Influenza Vaccine Innovation Centers (CIVICs contract # 75N93019C00051)  
576 and by institutional funds. Finally, this effort was also supported by the Serological Sciences  
577 Network (SeroNet) in part with Federal funds from the National Cancer Institute, National  
578 Institutes of Health, under Contract No. 75N91019D00024, Task Order No. 75N91020F00003.  
579 The content of this publication does not necessarily reflect the views or policies of the  
580 Department of Health and Human Services, nor does mention of trade names, commercial  
581 products or organizations imply endorsement by the U.S. Government.

582

583 **Author contributions:** Conception and design: AT, LCS, LAP, BH, AV. Patient referral  
584 recruitment and follow-up: AT, LCS, BD, IM. Data curation: AT, LCS. Laboratory investigations:

585 JMCQ, SS, VT, SC, TDB, JR, RO, MS. Logistical support : ML, RQ. Administrative support: EC,  
586 BW, FK, Data analysis: KP, All authors contributed to the writing of the manuscript.

587 **Conflict of interest statement:** The Icahn School of Medicine at Mount Sinai has filed patent  
588 applications relating to SARS-CoV-2 serological assays and NDV-based SARS-CoV-2 vaccines  
589 which list Florian Krammer as co-inventor. Mount Sinai has spun out a company, Kantaro, to  
590 market serological tests for SARS-CoV-2. Florian Krammer has consulted for Merck and Pfizer  
591 (before 2020), and is currently consulting for Pfizer, Seqirus, 3<sup>rd</sup> Rock Ventures and Avimex.  
592 The Krammer laboratory is also collaborating with Pfizer on animal models of SARS-CoV-2.

**Figure 1**

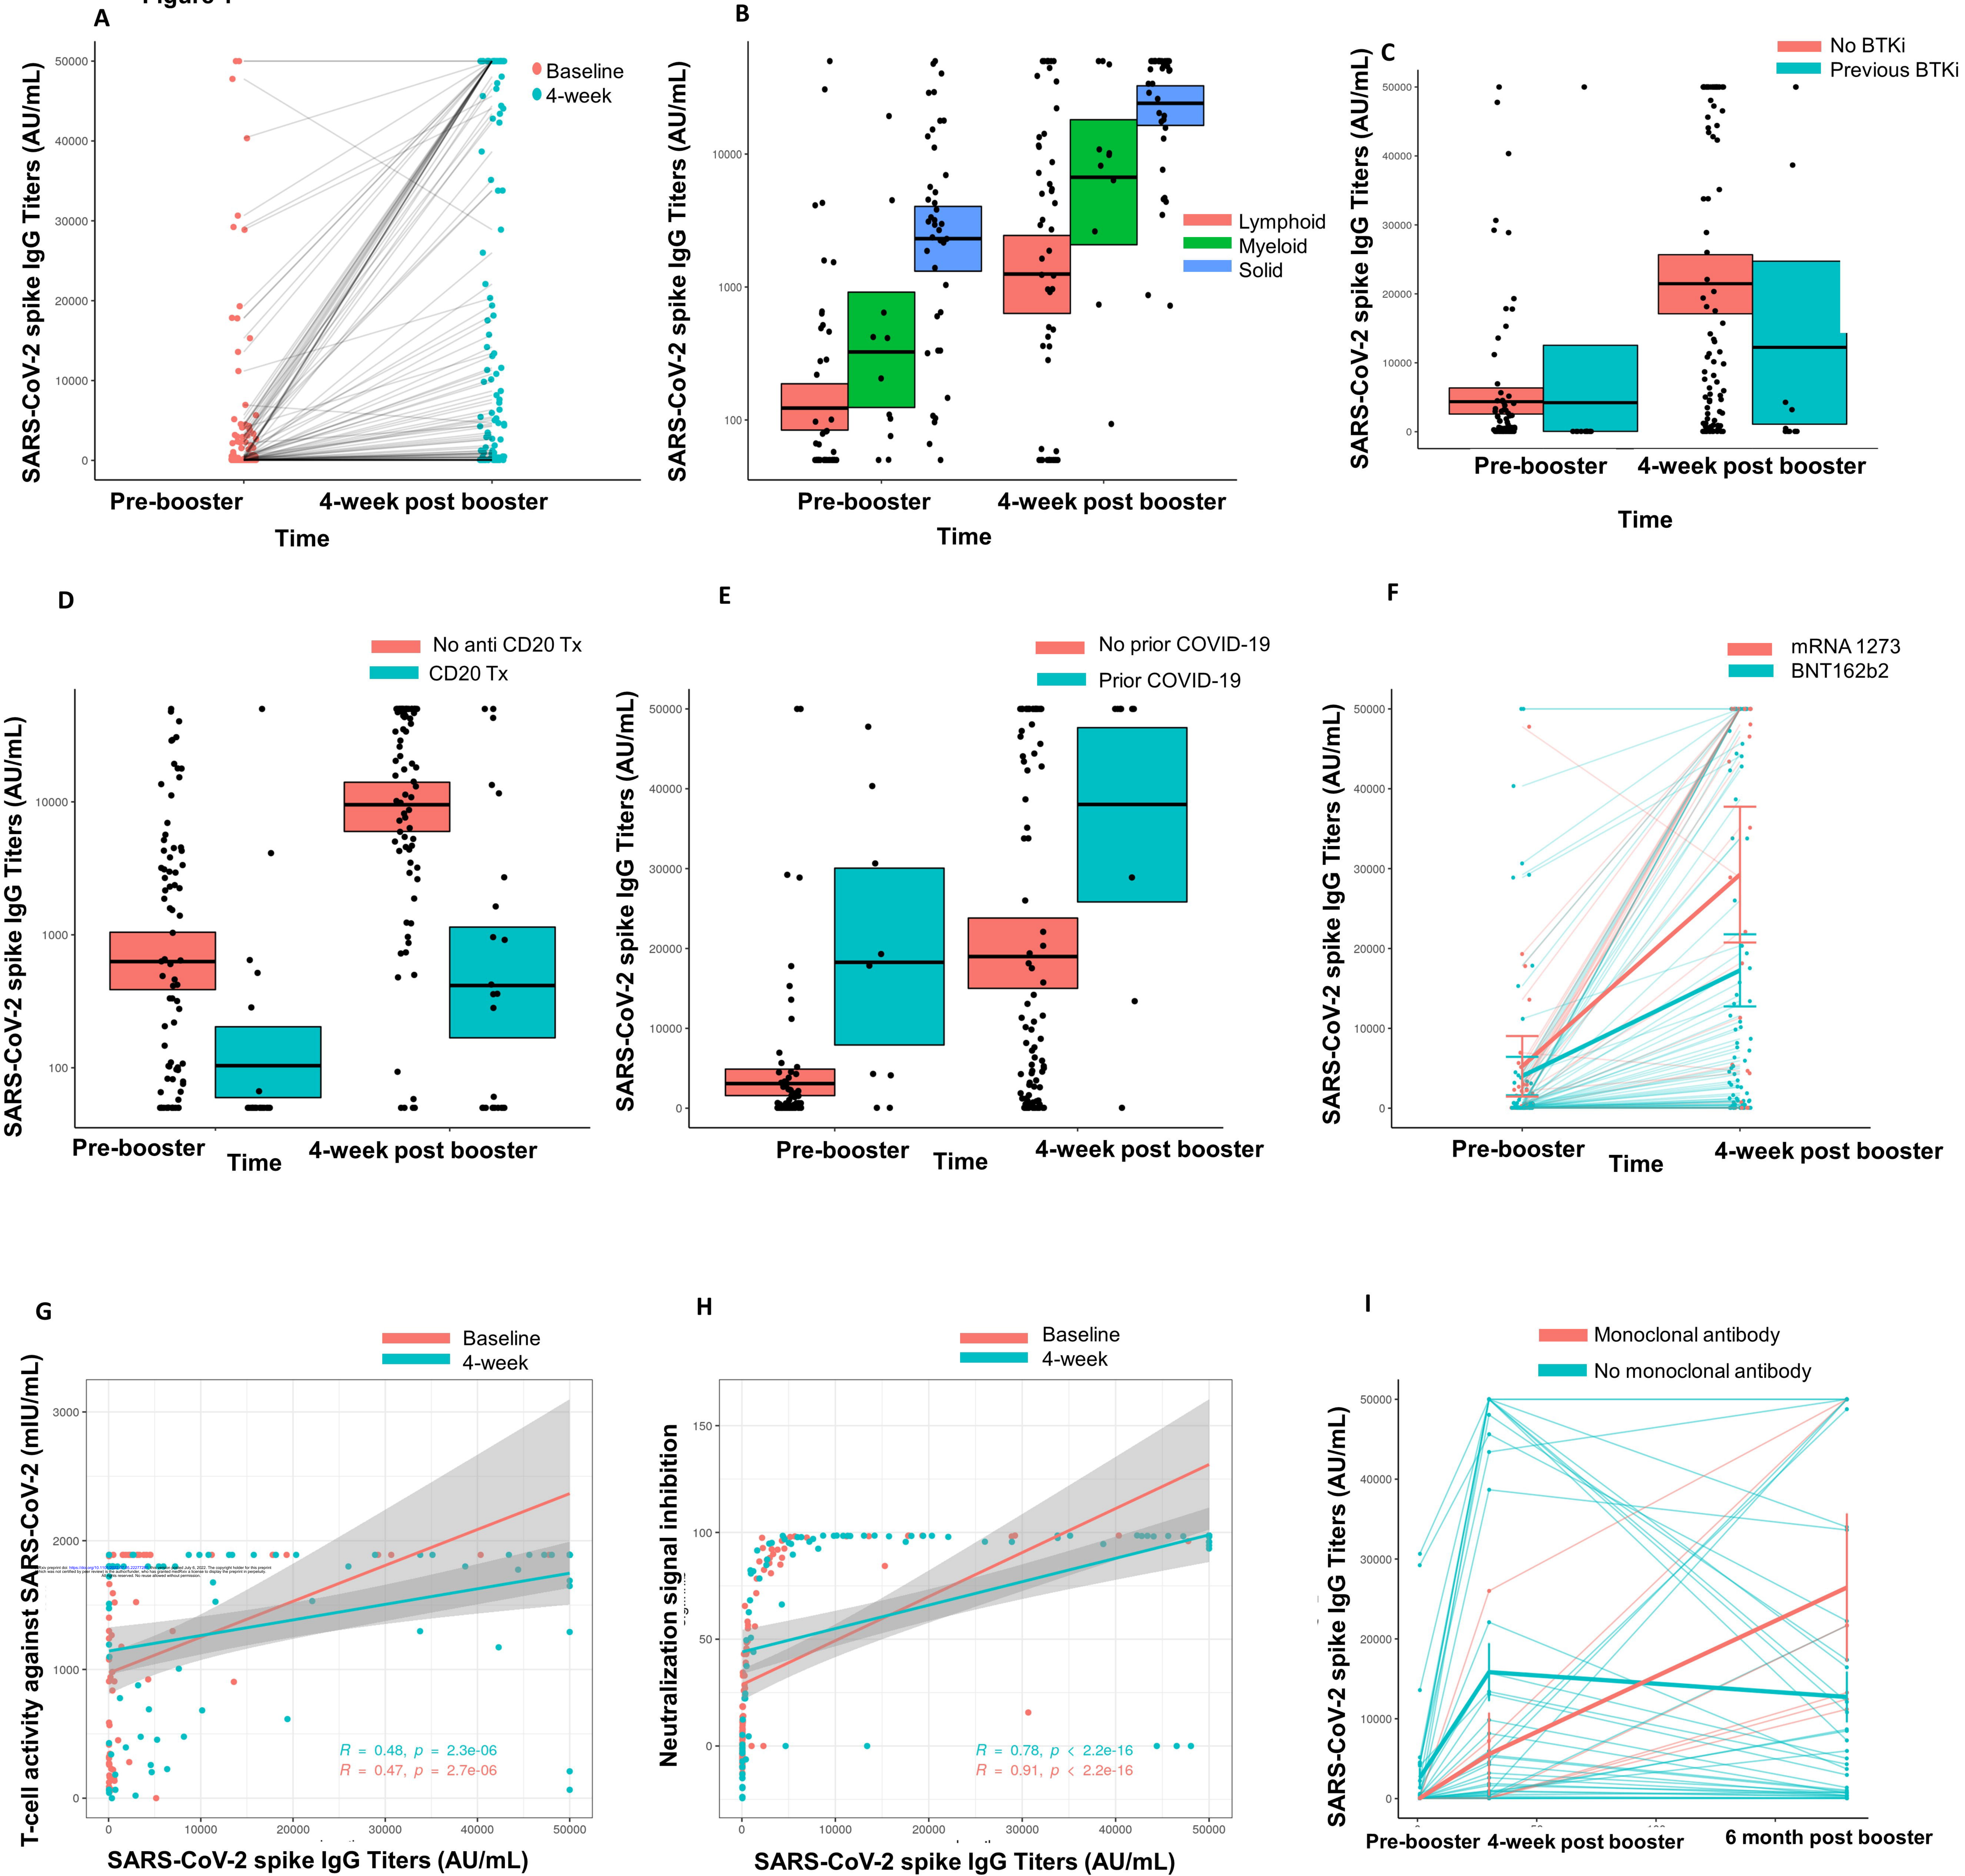

## **Figure 1: Immunogenicity of 3rd dose of COVID-19 vaccine in seronegative cancer patients**

Figure 1A: Figure showing change in anti-S antibody titer at 4 weeks for entire cohort

Figure 1B: Figure showing change in anti-S antibody titer at 4 weeks split by cancer type (solid cancer, lymphoid cancer and myeloid cancer)

Figure 1C: Figure showing effect of Bruton's tyrosine kinase inhibitor (BTKi) therapy on anti-S antibody titer at baseline and 4 weeks of 3<sup>rd</sup> dose

Figure 1D: Figure showing effect of anti-CD20 antibody therapy on anti-S antibody titer at baseline and 4 weeks of 3<sup>rd</sup> dose

Figure 1E: Figure showing effect of prior COVID-19 infection on anti-S antibody titer at baseline and 4 weeks of 3<sup>rd</sup> dose

Figure 1F: Figure showing effect of booster type (BNT162b2 vs mRNA 1273) on anti-S antibody titer at baseline and 4 weeks of 3<sup>rd</sup> dose.

Figure 1G: Line diagram showing correlation between anti-Spike IgG titer and baseline T-cell activity at baseline and 4 weeks

Figure 1H: Line diagram showing correlation between anti-S titer and signal inhibition for neutralization against WT virus at baseline and 4 weeks.

Figure 1I: Anti-Spike IgG titres at baseline, 4 weeks and 6 months after 3<sup>rd</sup> dose of COVID-19 vaccine in cancer patients. Line shows means with error bars (S.D.).

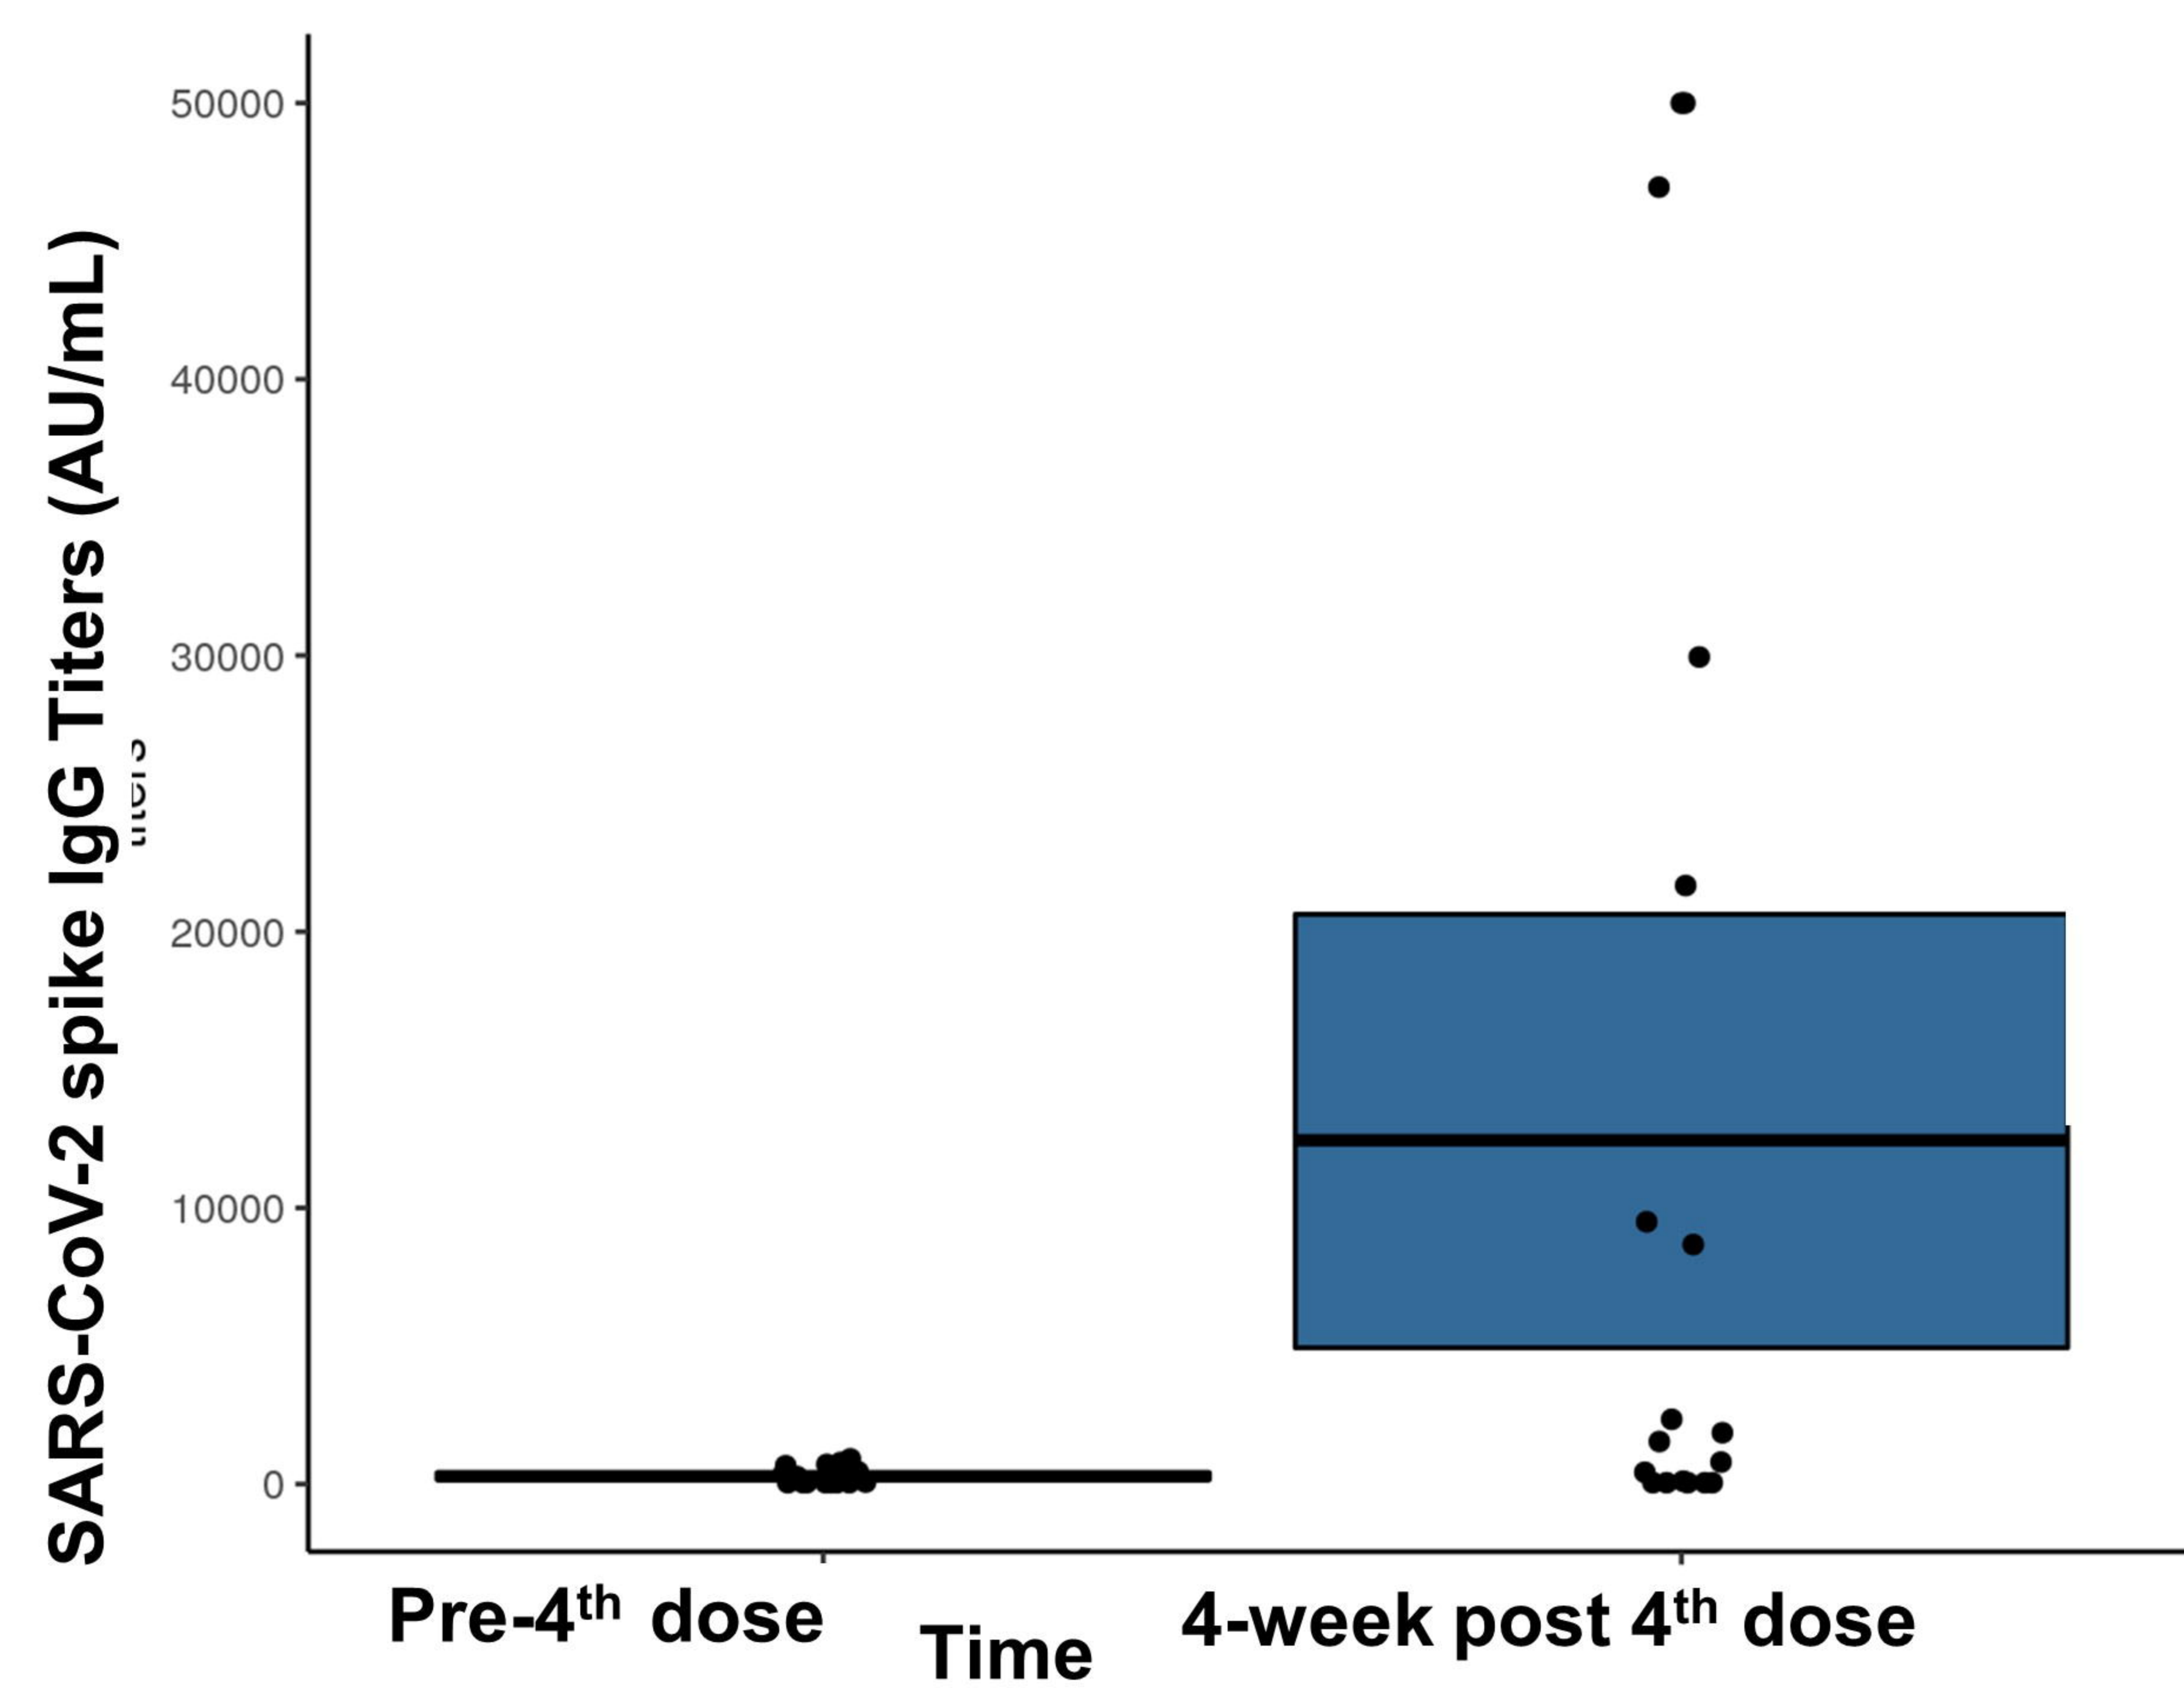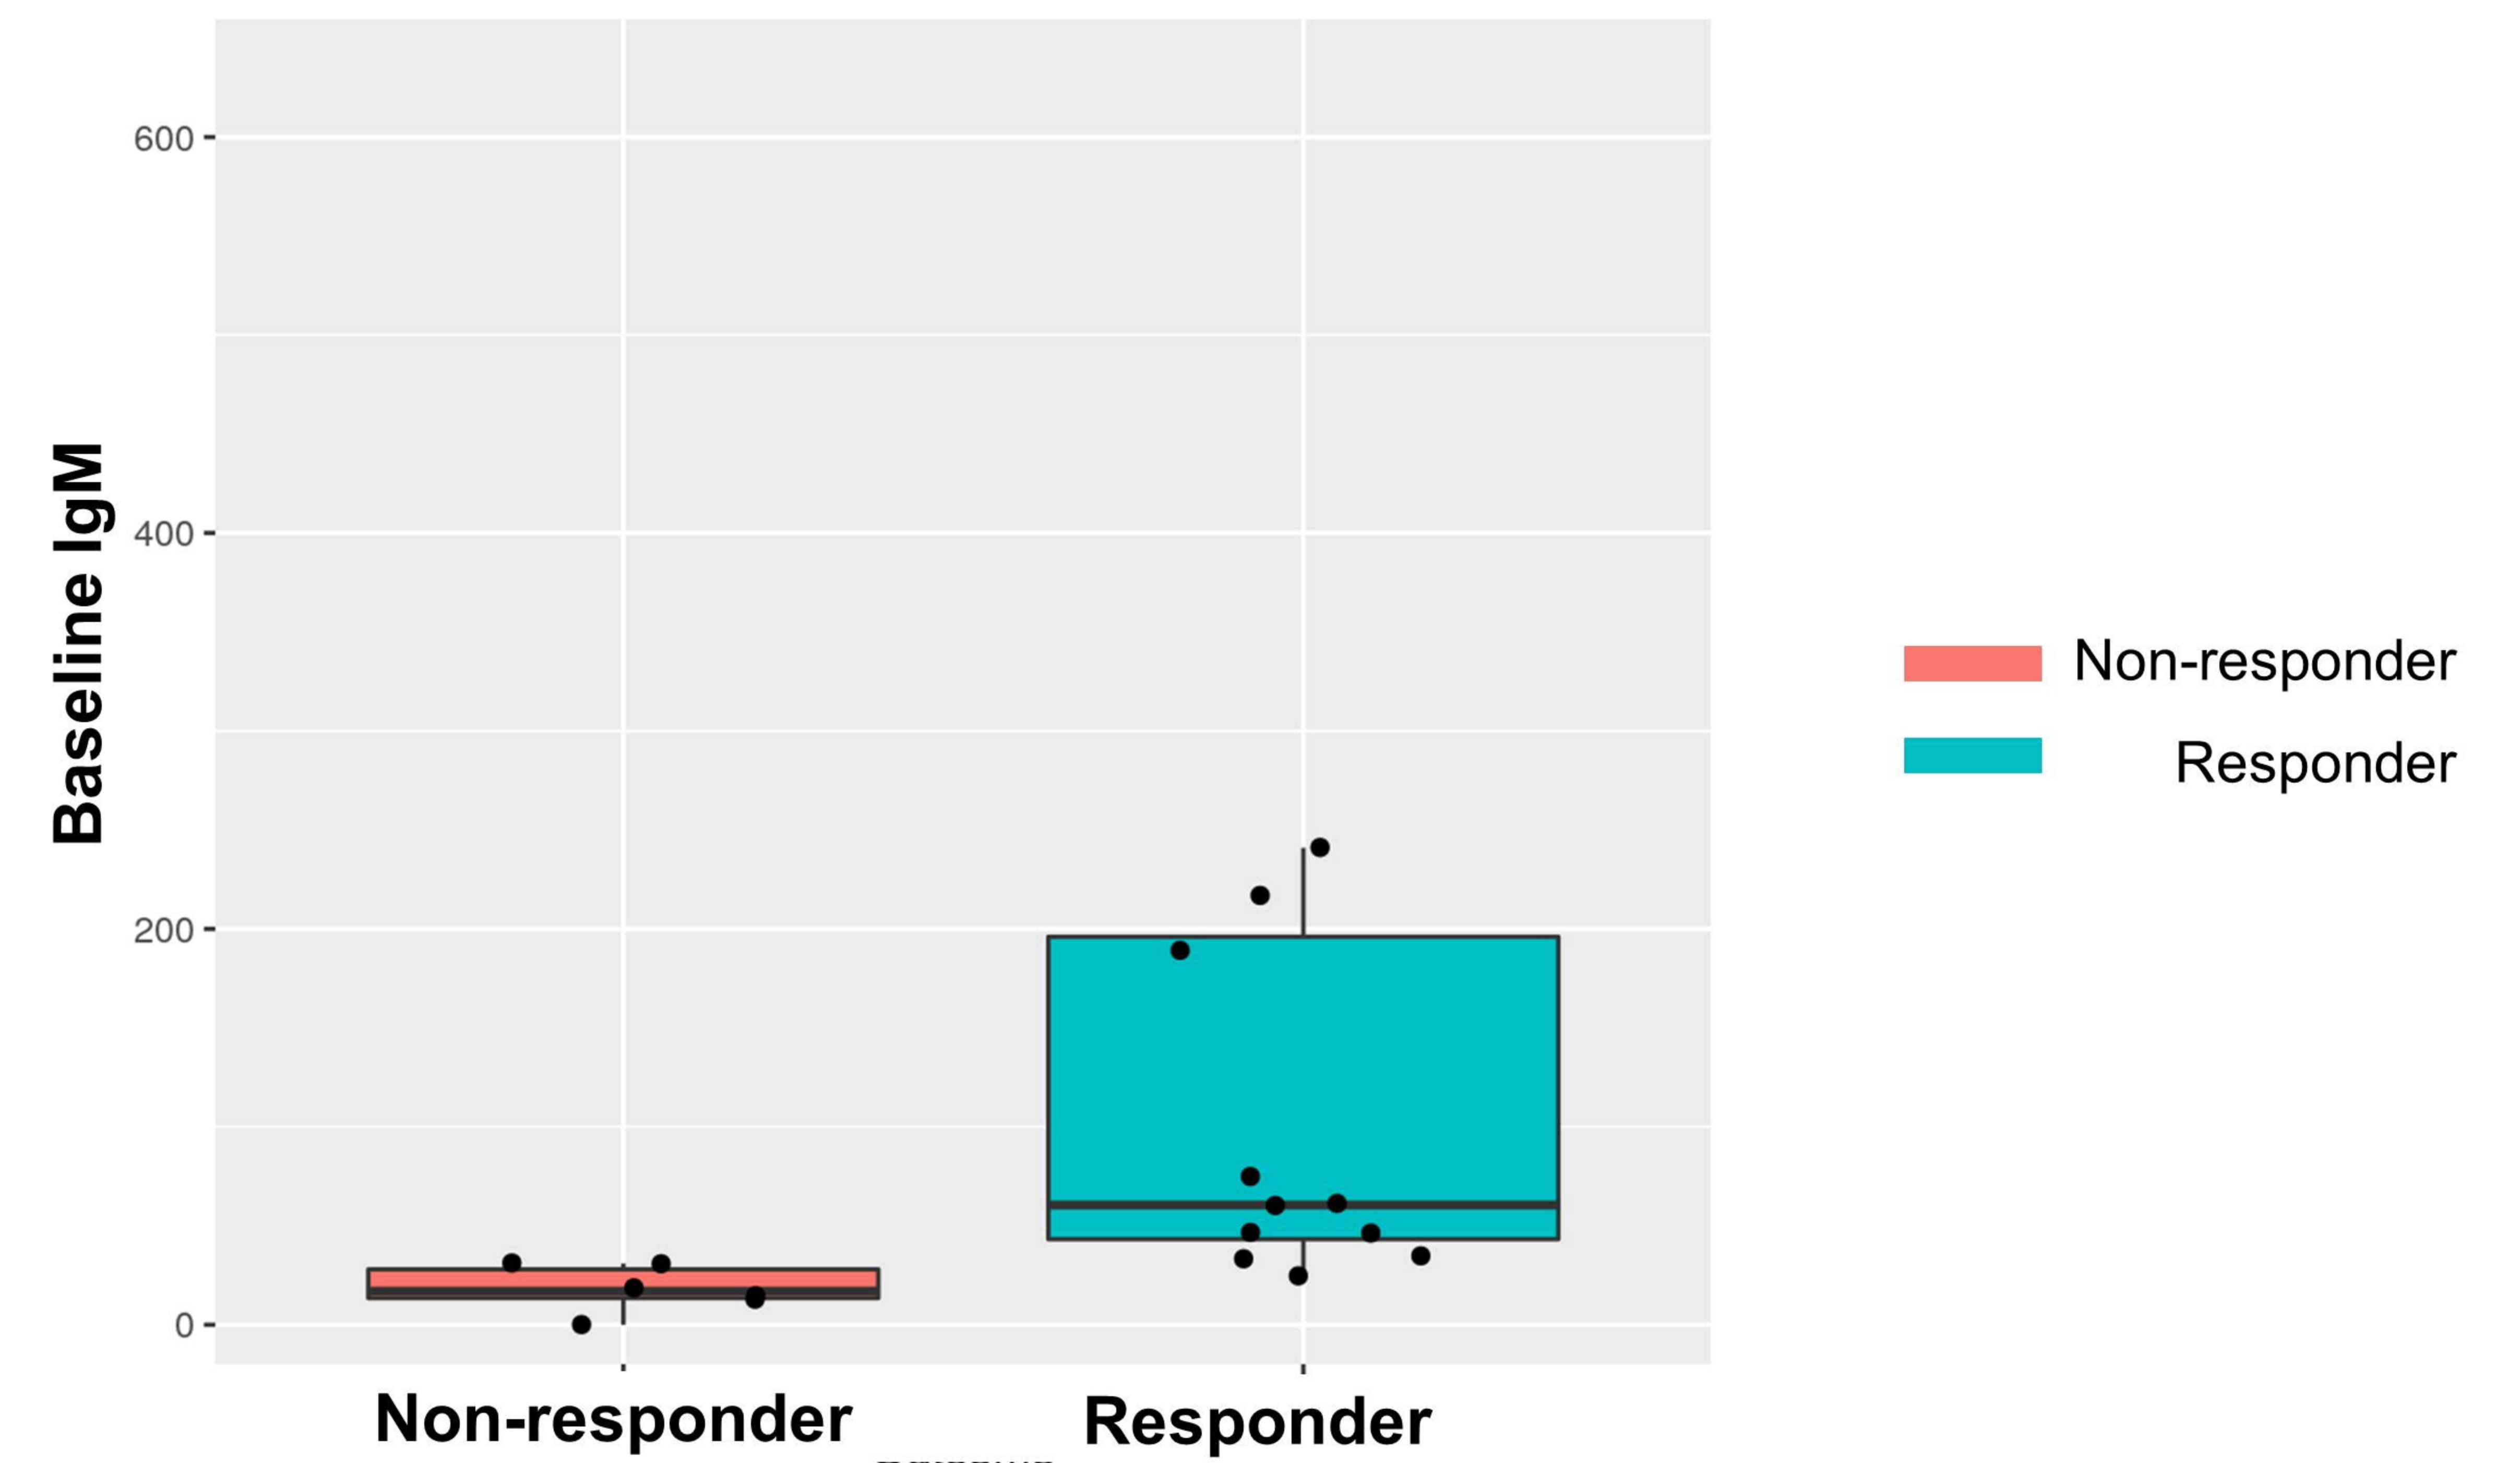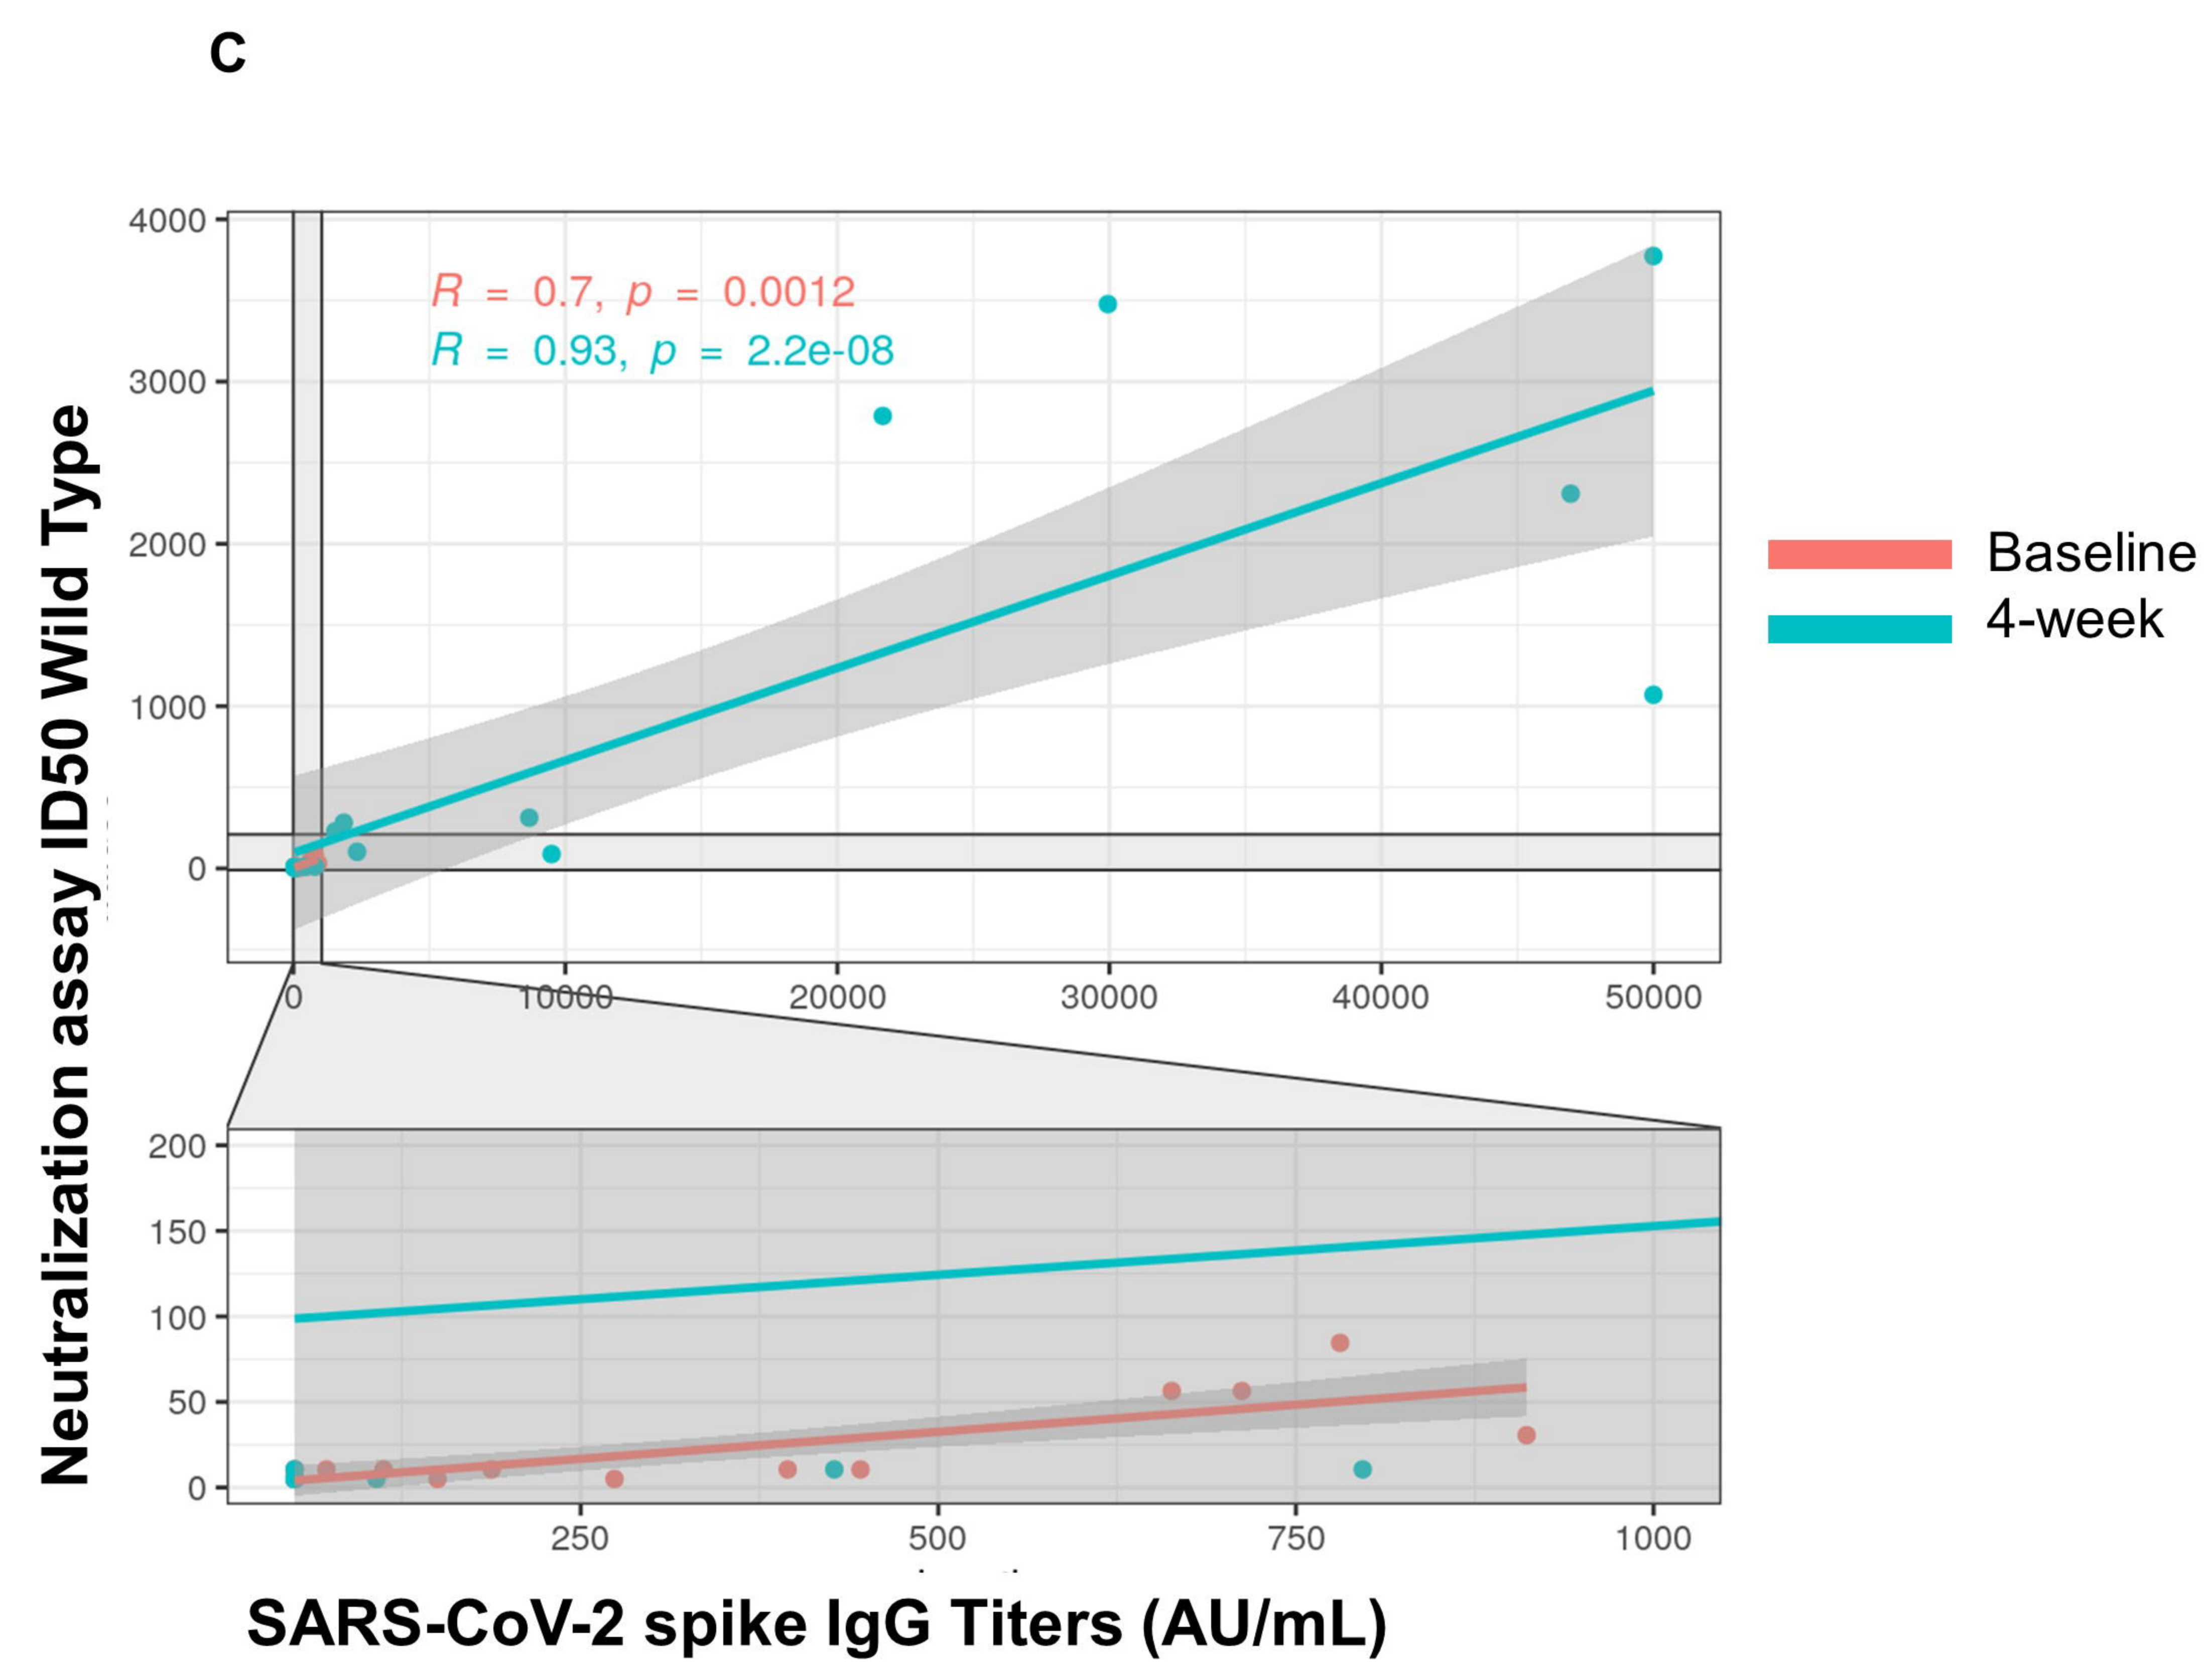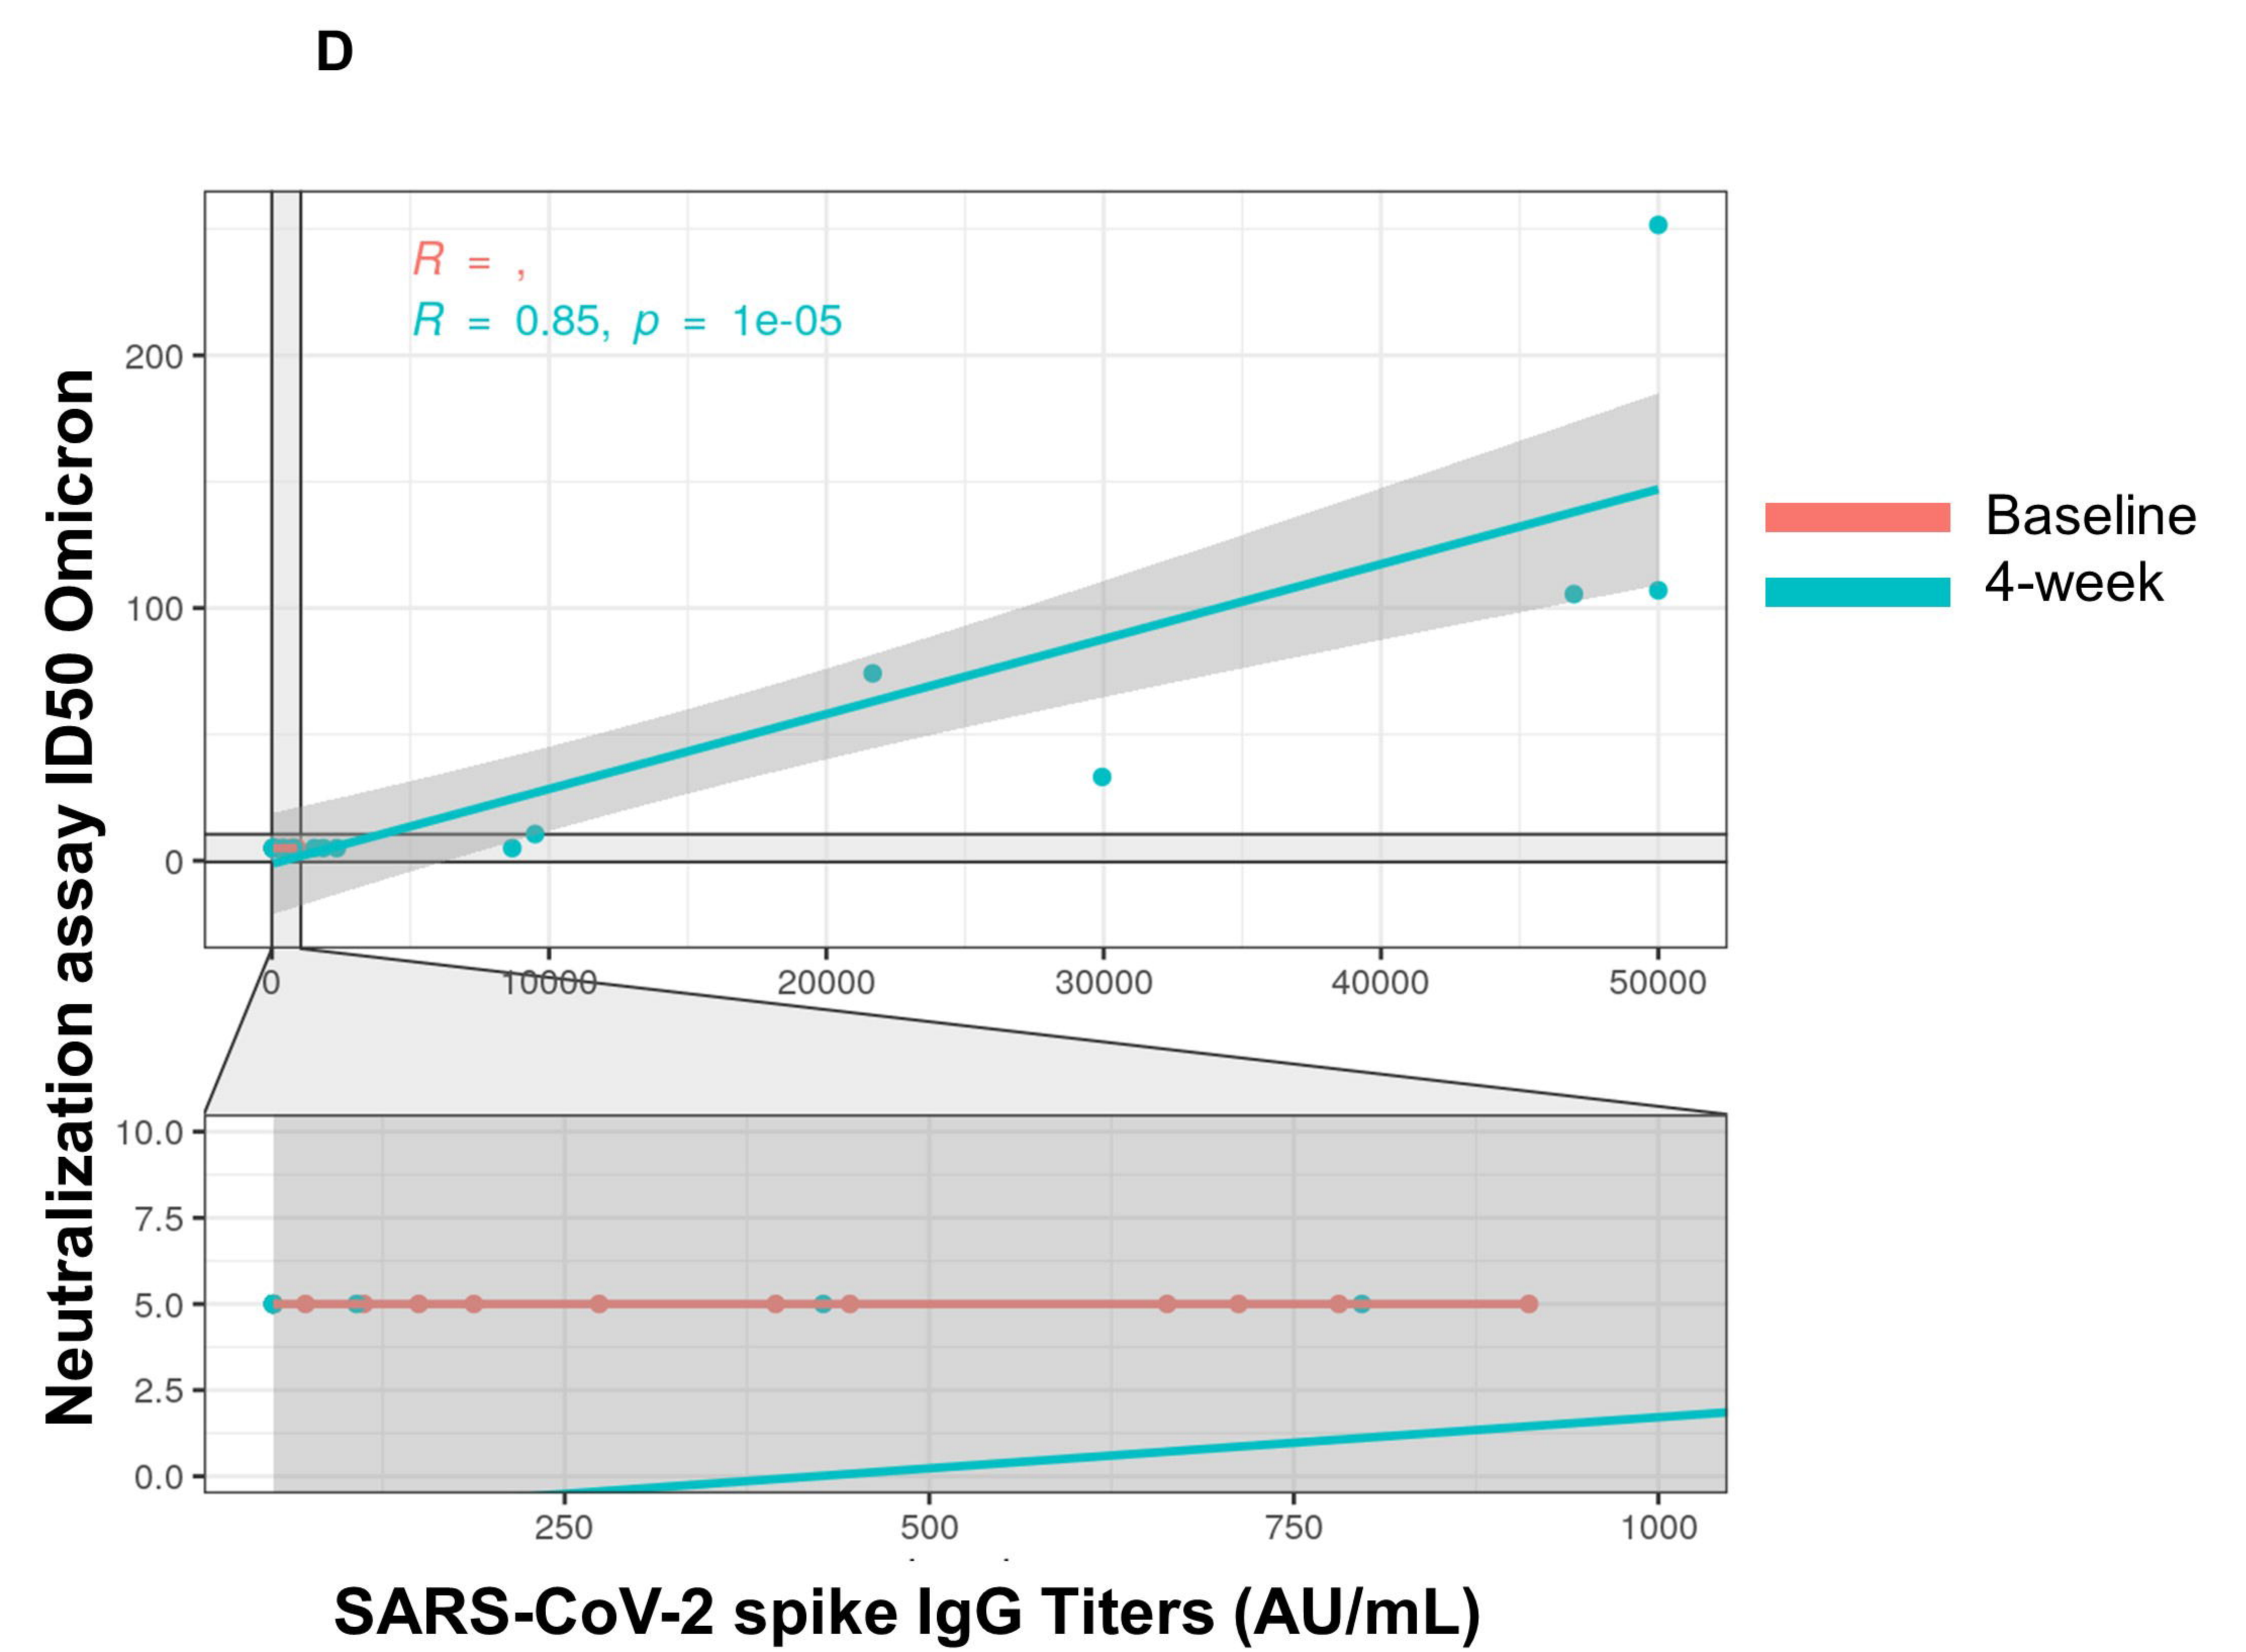

**Figure 2: Immunogenicity of the 4<sup>th</sup> dose of COVID-19 vaccine in cancer patients with seronegativity after 3 doses**

Figure 2A: Anti-spike IgG levels after the 4<sup>th</sup> dose of COVID-19 vaccine for the entire cohort

Figure 2B: Correlation of baseline IgM levels with response to 4<sup>th</sup> dose of vaccine

Figure 2C: Line diagram showing correlation between anti-S titer and neutralization activity for WT virus at baseline and 4 weeks

Figure 2D: Line diagram showing correlation between titer and neutralization activity for Omicron strain at baseline and 4 weeks
